# Supplementary material
Source: publisher figshare collection journal article supplement (https://acs.figshare.com/ndownloader/files/5088997)
Supplement: Supplementary file 1 [file 5088997]

 
data_lvp033 
  
_audit_creation_method            SHELXL-97 
_chemical_name_systematic 
; 
 ? 
; 
_chemical_name_common             ? 
_chemical_melting_point           ? 
_chemical_formula_moiety          ? 
_chemical_formula_sum 
 'C30 H45 B F4 O2 Ru3' 
_chemical_formula_weight          827.68 
  
loop_ 
 _atom_type_symbol 
 _atom_type_description 
 _atom_type_scat_dispersion_real 
 _atom_type_scat_dispersion_imag 
 _atom_type_scat_source 
 'C'  'C'   0.0033   0.0016 
 'International Tables Vol C Tables 4.2.6.8 and 6.1.1.4' 
 'H'  'H'   0.0000   0.0000 
 'International Tables Vol C Tables 4.2.6.8 and 6.1.1.4' 
 'B'  'B'   0.0013   0.0007 
 'International Tables Vol C Tables 4.2.6.8 and 6.1.1.4' 
 'F'  'F'   0.0171   0.0103 
 'International Tables Vol C Tables 4.2.6.8 and 6.1.1.4' 
 'O'  'O'   0.0106   0.0060 
 'International Tables Vol C Tables 4.2.6.8 and 6.1.1.4' 
 'Ru'  'Ru'  -1.2594   0.8363 
 'International Tables Vol C Tables 4.2.6.8 and 6.1.1.4' 
  
_symmetry_cell_setting            monoclinic 
_symmetry_space_group_name_H-M    'P 21' 
  
loop_ 
 _symmetry_equiv_pos_as_xyz 
 'x, y, z' 
 '-x, y+1/2, -z' 
  
_cell_length_a                    13.9242(11) 
_cell_length_b                    21.3124(13) 
_cell_length_c                    10.3496(8) 
_cell_angle_alpha                 90.00 
_cell_angle_beta                  93.597(9) 
_cell_angle_gamma                 90.00 
_cell_volume                      3065.3(4) 
_cell_formula_units_Z             4 
_cell_measurement_temperature     153(2) 
_cell_measurement_reflns_used     7998 
_cell_measurement_theta_min       2.28 
_cell_measurement_theta_max       25.90 
  
_exptl_crystal_description        block 
_exptl_crystal_colour             orange 
_exptl_crystal_size_max           0.50 
_exptl_crystal_size_mid           0.30 
_exptl_crystal_size_min           0.30 
_exptl_crystal_density_meas       none 
_exptl_crystal_density_diffrn     1.794 
_exptl_crystal_density_method     'not measured' 
_exptl_crystal_F_000              1656 
_exptl_absorpt_coefficient_mu     1.510 
_exptl_absorpt_correction_type    Semi-empirical 
_exptl_absorpt_correction_T_min   0.6520 
_exptl_absorpt_correction_T_max   0.7804 
_exptl_absorpt_process_details    'MULABS (PLATON99, Speck, 1999)' 
  
_exptl_special_details 
; 
 ? 
; 
  
_diffrn_ambient_temperature       153(2) 
_diffrn_radiation_wavelength      0.71073 
_diffrn_radiation_type            MoK\a 
_diffrn_radiation_source          'fine-focus sealed tube' 
_diffrn_radiation_monochromator   graphite 
_diffrn_measurement_device_type   'STOE IPDS' 
_diffrn_measurement_method        'phi oscillation' 
_diffrn_detector_area_resol_mean  0.81\%A 
_diffrn_standards_number          0 
_diffrn_standards_interval_count  ? 
_diffrn_standards_interval_time   0 
_diffrn_standards_decay_%         0 
_diffrn_reflns_number             23822 
_diffrn_reflns_av_R_equivalents   0.0354 
_diffrn_reflns_av_sigmaI/netI     0.0438 
_diffrn_reflns_limit_h_min        -17 
_diffrn_reflns_limit_h_max        17 
_diffrn_reflns_limit_k_min        -26 
_diffrn_reflns_limit_k_max        25 
_diffrn_reflns_limit_l_min        -12 
_diffrn_reflns_limit_l_max        12 
_diffrn_reflns_theta_min          1.97 
_diffrn_reflns_theta_max          25.92 
_reflns_number_total              10664 
_reflns_number_gt                 9146 
_reflns_threshold_expression      >2sigma(I) 
  
_computing_data_collection        'EXPOSE (Stoe IPDS Software, 2000)' 
_computing_cell_refinement        'CELL (Stoe IPDS Software, 2000)' 
_computing_data_reduction         'INTEGRATE (Stoe IPDS Software, 2000)' 
_computing_structure_solution     'SHELXS-97 (Sheldrick, 1990)' 
_computing_structure_refinement   'SHELXL-97 (Sheldrick, 1997)' 
_computing_molecular_graphics     'PLATON99 (Spek, 1990)' 
_computing_publication_material   'SHELXL-97 (Sheldrick, 1997)' 
  
_refine_special_details 
; 
 Refinement of F^2^ against ALL reflections.  The weighted R-factor wR and 
 goodness of fit S are based on F^2^, conventional R-factors R are based 
 on F, with F set to zero for negative F^2^. The threshold expression of 
 F^2^ > 2sigma(F^2^) is used only for calculating R-factors(gt) etc. and is 
 not relevant to the choice of reflections for refinement.  R-factors based 
 on F^2^ are statistically about twice as large as those based on F, and R- 
 factors based on ALL data will be even larger. 
; 
  
_refine_ls_structure_factor_coef  Fsqd 
_refine_ls_matrix_type            full 
_refine_ls_weighting_scheme       calc 
_refine_ls_weighting_details 
 'calc w=1/[\s^2^(Fo^2^)+(0.0545P)^2^+0.0000P] where P=(Fo^2^+2Fc^2^)/3' 
_atom_sites_solution_primary      direct 
_atom_sites_solution_secondary    difmap 
_atom_sites_solution_hydrogens    geom 
_refine_ls_hydrogen_treatment     mixed 
_refine_ls_extinction_method      none 
_refine_ls_extinction_coef        ? 
_refine_ls_abs_structure_details 
 'Flack H D (1983), Acta Cryst. A39, 876-881' 
_refine_ls_abs_structure_Flack    0.02(4) 
_refine_ls_number_reflns          10664 
_refine_ls_number_parameters      645 
_refine_ls_number_restraints      1 
_refine_ls_R_factor_all           0.0422 
_refine_ls_R_factor_gt            0.0337 
_refine_ls_wR_factor_ref          0.0821 
_refine_ls_wR_factor_gt           0.0782 
_refine_ls_goodness_of_fit_ref    0.965 
_refine_ls_restrained_S_all       0.965 
_refine_ls_shift/su_max           0.004 
_refine_ls_shift/su_mean          0.000 
  
loop_ 
 _atom_site_label 
 _atom_site_type_symbol 
 _atom_site_fract_x 
 _atom_site_fract_y 
 _atom_site_fract_z 
 _atom_site_U_iso_or_equiv 
 _atom_site_adp_type 
 _atom_site_occupancy 
 _atom_site_symetry_multiplicity 
 _atom_site_calc_flag 
 _atom_site_refinement_flags 
 _atom_site_disorder_assembly 
 _atom_site_disorder_group 
C1 C 0.3435(6) 0.4427(4) -0.9284(7) 0.0346(11) Uani 1 1 d . . . 
C2 C 0.3031(6) 0.5021(4) -0.9636(7) 0.0346(11) Uani 1 1 d . . . 
C3 C 0.3056(6) 0.5532(4) -0.8661(7) 0.0346(11) Uani 1 1 d . . . 
C4 C 0.3470(6) 0.5391(4) -0.7364(7) 0.0349(19) Uani 1 1 d . . . 
C5 C 0.3823(7) 0.4779(4) -0.7060(7) 0.0330(19) Uani 1 1 d . . . 
C6 C 0.3800(6) 0.4299(4) -0.8005(8) 0.0331(19) Uani 1 1 d . . . 
C7 C 0.3475(8) 0.3930(5) -1.0321(10) 0.060(3) Uani 1 1 d . . . 
H7A H 0.4139 0.3781 -1.0358 0.090 Uiso 1 1 calc R . . 
H7B H 0.3256 0.4109 -1.1160 0.090 Uiso 1 1 calc R . . 
H7C H 0.3058 0.3578 -1.0115 0.090 Uiso 1 1 calc R . . 
C8 C 0.2591(8) 0.5189(8) -1.0945(8) 0.074(4) Uani 1 1 d . . . 
H8A H 0.1940 0.5352 -1.0862 0.111 Uiso 1 1 calc R . . 
H8B H 0.2561 0.4814 -1.1497 0.111 Uiso 1 1 calc R . . 
H8C H 0.2985 0.5510 -1.1336 0.111 Uiso 1 1 calc R . . 
C9 C 0.2715(8) 0.6163(5) -0.9060(13) 0.066(3) Uani 1 1 d . . . 
H9A H 0.2818 0.6227 -0.9979 0.100 Uiso 1 1 calc R . . 
H9B H 0.3073 0.6481 -0.8543 0.100 Uiso 1 1 calc R . . 
H9C H 0.2027 0.6200 -0.8924 0.100 Uiso 1 1 calc R . . 
C10 C 0.3447(9) 0.5905(5) -0.6353(11) 0.067(3) Uani 1 1 d . . . 
H10A H 0.3390 0.6314 -0.6784 0.100 Uiso 1 1 calc R . . 
H10B H 0.4042 0.5892 -0.5795 0.100 Uiso 1 1 calc R . . 
H10C H 0.2894 0.5840 -0.5827 0.100 Uiso 1 1 calc R . . 
C11 C 0.4286(8) 0.4632(5) -0.5727(8) 0.056(3) Uani 1 1 d . . . 
H11A H 0.4273 0.5007 -0.5180 0.083 Uiso 1 1 calc R . . 
H11B H 0.4955 0.4500 -0.5807 0.083 Uiso 1 1 calc R . . 
H11C H 0.3930 0.4292 -0.5333 0.083 Uiso 1 1 calc R . . 
C12 C 0.4142(9) 0.3647(5) -0.7685(12) 0.062(3) Uani 1 1 d . . . 
H12A H 0.4824 0.3659 -0.7392 0.093 Uiso 1 1 calc R . . 
H12B H 0.4056 0.3382 -0.8457 0.093 Uiso 1 1 calc R . . 
H12C H 0.3768 0.3474 -0.6996 0.093 Uiso 1 1 calc R . . 
C13 C 0.7397(6) 0.5745(4) -0.6724(6) 0.0309(10) Uani 1 1 d . . . 
C14 C 0.6542(6) 0.6022(4) -0.6226(7) 0.0309(10) Uani 1 1 d . . . 
H14A H 0.6266 0.5839 -0.5499 0.037 Uiso 1 1 calc R . . 
C15 C 0.6119(7) 0.6558(4) -0.6812(7) 0.034(2) Uani 1 1 d . . . 
H15A H 0.5585 0.6744 -0.6431 0.041 Uiso 1 1 calc R . . 
C16 C 0.6451(7) 0.6831(4) -0.7931(7) 0.037(2) Uani 1 1 d . . . 
C17 C 0.7302(6) 0.6567(4) -0.8424(7) 0.0309(10) Uani 1 1 d . . . 
H17A H 0.7578 0.6759 -0.9141 0.037 Uiso 1 1 calc R . . 
C18 C 0.7730(6) 0.6031(4) -0.7864(6) 0.0309(10) Uani 1 1 d . . . 
H18A H 0.8264 0.5850 -0.8256 0.037 Uiso 1 1 calc R . . 
C19 C 0.7885(6) 0.5180(4) -0.6145(7) 0.0314(18) Uani 1 1 d . . . 
H19A H 0.8260 0.4979 -0.6827 0.038 Uiso 1 1 calc R . . 
C20 C 0.7196(7) 0.4687(4) -0.5656(8) 0.038(2) Uani 1 1 d . . . 
H20A H 0.6731 0.4566 -0.6362 0.058 Uiso 1 1 calc R . . 
H20B H 0.6853 0.4862 -0.4941 0.058 Uiso 1 1 calc R . . 
H20C H 0.7563 0.4317 -0.5353 0.058 Uiso 1 1 calc R . . 
C21 C 0.8612(7) 0.5408(5) -0.5042(8) 0.048(2) Uani 1 1 d . . . 
H21A H 0.9050 0.5717 -0.5387 0.071 Uiso 1 1 calc R . . 
H21B H 0.8984 0.5050 -0.4690 0.071 Uiso 1 1 calc R . . 
H21C H 0.8261 0.5601 -0.4353 0.071 Uiso 1 1 calc R . . 
C22 C 0.5916(9) 0.7371(4) -0.8602(9) 0.055(3) Uani 1 1 d . . . 
H22A H 0.5962 0.7335 -0.9540 0.083 Uiso 1 1 calc R . . 
H22B H 0.6202 0.7769 -0.8300 0.083 Uiso 1 1 calc R . . 
H22C H 0.5238 0.7358 -0.8400 0.083 Uiso 1 1 calc R . . 
C23 C 0.5701(7) 0.6001(4) -1.2342(7) 0.0358(19) Uani 1 1 d . . . 
C24 C 0.6669(6) 0.5865(4) -1.2018(6) 0.0342(13) Uani 1 1 d . . . 
H24A H 0.7121 0.6194 -1.1864 0.041 Uiso 1 1 calc R . . 
C25 C 0.6968(6) 0.5228(4) -1.1923(7) 0.0342(13) Uani 1 1 d . . . 
H25A H 0.7620 0.5136 -1.1668 0.041 Uiso 1 1 calc R . . 
C26 C 0.6335(8) 0.4740(4) -1.2191(7) 0.038(2) Uani 1 1 d . . . 
H26A H 0.6558 0.4319 -1.2160 0.046 Uiso 1 1 calc R . . 
C27 C 0.5338(7) 0.4870(4) -1.2516(6) 0.035(2) Uani 1 1 d . . . 
H27A H 0.4890 0.4536 -1.2639 0.042 Uiso 1 1 calc R . . 
C28 C 0.5033(7) 0.5491(5) -1.2650(6) 0.046(2) Uani 1 1 d . . . 
H28A H 0.4387 0.5581 -1.2943 0.055 Uiso 1 1 calc R . . 
C29 C 0.5349(7) 0.6696(5) -1.2205(8) 0.049(2) Uani 1 1 d . . . 
H29A H 0.5863 0.6957 -1.1751 0.058 Uiso 1 1 calc R . . 
C30 C 0.5100(6) 0.6952(3) -1.3568(7) 0.0445(19) Uani 1 1 d . . . 
H30A H 0.5626 0.6858 -1.4124 0.067 Uiso 1 1 calc R . . 
H30B H 0.5008 0.7407 -1.3525 0.067 Uiso 1 1 calc R . . 
H30C H 0.4506 0.6754 -1.3927 0.067 Uiso 1 1 calc R . . 
C31 C -0.1290(7) 0.9262(4) -0.3232(8) 0.037(2) Uani 1 1 d . . . 
C32 C -0.1228(6) 0.8763(4) -0.2318(7) 0.0347(19) Uani 1 1 d . . . 
C33 C -0.1625(6) 0.8154(4) -0.2653(8) 0.037(2) Uani 1 1 d . . . 
C34 C -0.1959(6) 0.8051(5) -0.3959(8) 0.0453(13) Uani 1 1 d . . . 
C35 C -0.2006(6) 0.8531(5) -0.4865(8) 0.0453(13) Uani 1 1 d . . . 
C36 C -0.1634(6) 0.9123(5) -0.4514(8) 0.0453(13) Uani 1 1 d . . . 
C37 C -0.0914(8) 0.9912(5) -0.2866(12) 0.066(3) Uani 1 1 d . . . 
H37A H -0.0264 0.9964 -0.3166 0.099 Uiso 1 1 calc R . . 
H37B H -0.0893 0.9961 -0.1923 0.099 Uiso 1 1 calc R . . 
H37C H -0.1341 1.0231 -0.3273 0.099 Uiso 1 1 calc R . . 
C38 C -0.0807(8) 0.8896(7) -0.0942(9) 0.065(3) Uani 1 1 d . . . 
H38A H -0.0281 0.9200 -0.0974 0.097 Uiso 1 1 calc R . . 
H38B H -0.0561 0.8505 -0.0548 0.097 Uiso 1 1 calc R . . 
H38C H -0.1310 0.9068 -0.0423 0.097 Uiso 1 1 calc R . . 
C39 C -0.1601(10) 0.7649(7) -0.1615(13) 0.087(5) Uani 1 1 d . . . 
H39A H -0.1231 0.7800 -0.0840 0.131 Uiso 1 1 calc R . . 
H39B H -0.1298 0.7270 -0.1938 0.131 Uiso 1 1 calc R . . 
H39C H -0.2260 0.7552 -0.1398 0.131 Uiso 1 1 calc R . . 
C40 C -0.2256(10) 0.7384(6) -0.4323(16) 0.094(5) Uani 1 1 d . . . 
H40A H -0.2256 0.7127 -0.3539 0.141 Uiso 1 1 calc R . . 
H40B H -0.1800 0.7209 -0.4909 0.141 Uiso 1 1 calc R . . 
H40C H -0.2903 0.7388 -0.4754 0.141 Uiso 1 1 calc R . . 
C41 C -0.2357(7) 0.8404(8) -0.6263(10) 0.086(4) Uani 1 1 d . . . 
H41A H -0.1971 0.8648 -0.6844 0.129 Uiso 1 1 calc R . . 
H41B H -0.3034 0.8527 -0.6394 0.129 Uiso 1 1 calc R . . 
H41C H -0.2292 0.7956 -0.6451 0.129 Uiso 1 1 calc R . . 
C42 C -0.1619(10) 0.9636(7) -0.5548(12) 0.086(5) Uani 1 1 d . . . 
H42A H -0.1568 0.9443 -0.6400 0.129 Uiso 1 1 calc R . . 
H42B H -0.1065 0.9912 -0.5357 0.129 Uiso 1 1 calc R . . 
H42C H -0.2213 0.9882 -0.5547 0.129 Uiso 1 1 calc R . . 
C43 C 0.2368(6) 0.7894(4) -0.1888(7) 0.0365(12) Uani 1 1 d . . . 
C44 C 0.2723(6) 0.7607(4) -0.3019(7) 0.0365(12) Uani 1 1 d . . . 
H44A H 0.3259 0.7784 -0.3412 0.044 Uiso 1 1 calc R . . 
C45 C 0.2263(7) 0.7047(4) -0.3562(8) 0.0365(12) Uani 1 1 d . . . 
H45A H 0.2505 0.6856 -0.4304 0.044 Uiso 1 1 calc R . . 
C46 C 0.1486(8) 0.6791(4) -0.3018(8) 0.049(3) Uani 1 1 d . . . 
C47 C 0.1099(7) 0.7067(4) -0.1901(8) 0.039(2) Uani 1 1 d . . . 
H47A H 0.0562 0.6887 -0.1516 0.047 Uiso 1 1 calc R . . 
C48 C 0.1551(6) 0.7626(3) -0.1384(6) 0.0272(15) Uani 1 1 d . . . 
H48A H 0.1284 0.7823 -0.0666 0.033 Uiso 1 1 calc R . . 
C49 C 0.2875(6) 0.8473(4) -0.1318(7) 0.0324(19) Uani 1 1 d . . . 
H49A H 0.3232 0.8677 -0.2014 0.039 Uiso 1 1 calc R . . 
C50 C 0.3615(6) 0.8259(5) -0.0233(8) 0.041(2) Uani 1 1 d . . . 
H50A H 0.3277 0.8130 0.0525 0.062 Uiso 1 1 calc R . . 
H50B H 0.4051 0.8608 0.0005 0.062 Uiso 1 1 calc R . . 
H50C H 0.3987 0.7905 -0.0541 0.062 Uiso 1 1 calc R . . 
C51 C 0.2189(8) 0.8948(4) -0.0816(9) 0.046(2) Uani 1 1 d . . . 
H51A H 0.1729 0.9078 -0.1521 0.069 Uiso 1 1 calc R . . 
H51B H 0.2551 0.9315 -0.0484 0.069 Uiso 1 1 calc R . . 
H51C H 0.1841 0.8761 -0.0118 0.069 Uiso 1 1 calc R . . 
C52 C 0.0975(11) 0.6232(4) -0.3632(11) 0.076(4) Uani 1 1 d . . . 
H52A H 0.0327 0.6357 -0.3961 0.114 Uiso 1 1 calc R . . 
H52B H 0.0927 0.5900 -0.2985 0.114 Uiso 1 1 calc R . . 
H52C H 0.1337 0.6078 -0.4348 0.114 Uiso 1 1 calc R . . 
C53 C 0.0689(7) 0.7717(4) -0.7746(8) 0.042(2) Uani 1 1 d . . . 
C54 C 0.0080(6) 0.8226(4) -0.7896(7) 0.040(2) Uani 1 1 d . . . 
H54A H -0.0575 0.8166 -0.8183 0.048 Uiso 1 1 calc R . . 
C55 C 0.0437(7) 0.8846(4) -0.7620(6) 0.0326(19) Uani 1 1 d . . . 
H55A H 0.0010 0.9193 -0.7697 0.039 Uiso 1 1 calc R . . 
C56 C 0.1382(7) 0.8943(4) -0.7248(8) 0.037(2) Uani 1 1 d . . . 
H56A H 0.1623 0.9358 -0.7140 0.045 Uiso 1 1 calc R . . 
C57 C 0.2003(7) 0.8422(5) -0.7023(7) 0.044(2) Uani 1 1 d . . . 
H57A H 0.2646 0.8483 -0.6685 0.053 Uiso 1 1 calc R . . 
C58 C 0.1662(7) 0.7818(4) -0.7300(7) 0.0378(19) Uani 1 1 d . . . 
H58A H 0.2086 0.7471 -0.7189 0.045 Uiso 1 1 calc R . . 
C59 C 0.0374(8) 0.7063(5) -0.8121(12) 0.071(3) Uani 1 1 d . . . 
H59A H 0.0887 0.6874 -0.8631 0.085 Uiso 1 1 calc R . . 
C60 C 0.0249(13) 0.6680(6) -0.7084(13) 0.107(6) Uani 1 1 d . . . 
H60A H -0.0242 0.6859 -0.6554 0.161 Uiso 1 1 calc R . . 
H60B H 0.0858 0.6642 -0.6562 0.161 Uiso 1 1 calc R . . 
H60C H 0.0041 0.6264 -0.7393 0.161 Uiso 1 1 calc R . . 
B1 B 0.9539(8) 0.5610(5) -1.0572(12) 0.049(3) Uani 1 1 d . . . 
B2 B 0.4543(9) 0.8056(5) -0.6007(11) 0.048(3) Uani 1 1 d . . . 
F1 F 0.8973(6) 0.6137(4) -1.0774(9) 0.1044(13) Uani 1 1 d . . . 
F2 F 1.0416(6) 0.5791(4) -1.0114(9) 0.1044(13) Uani 1 1 d . . . 
F3 F 0.9556(6) 0.5306(3) -1.1736(9) 0.1044(13) Uani 1 1 d . . . 
F4 F 0.9155(6) 0.5204(4) -0.9783(9) 0.1044(13) Uani 1 1 d . . . 
F5 F 0.4088(4) 0.8402(3) -0.5096(6) 0.0637(15) Uani 1 1 d . . . 
F6 F 0.4481(7) 0.8413(3) -0.7164(6) 0.097(2) Uani 1 1 d . . . 
F7 F 0.5499(3) 0.7958(2) -0.5634(6) 0.0573(14) Uani 1 1 d . . . 
F8 F 0.4087(4) 0.7501(2) -0.6258(6) 0.0704(19) Uani 1 1 d . . . 
O1 O 0.5064(4) 0.5923(2) -0.9540(4) 0.0241(12) Uani 1 1 d . . . 
O2 O 0.4505(4) 0.6709(3) -1.1526(6) 0.0562(15) Uani 1 1 d . . . 
H2A H 0.4131 0.6424 -1.1806 0.067 Uiso 1 1 calc R . . 
O3 O 0.0083(4) 0.7676(2) -0.4753(4) 0.0246(12) Uani 1 1 d . . . 
O4 O -0.0463(7) 0.7128(4) -0.8959(9) 0.115(4) Uani 1 1 d . . . 
H4A H -0.0624 0.6775 -0.9264 0.138 Uiso 1 1 calc R . . 
Ru1 Ru 0.45146(4) 0.51503(2) -0.87735(5) 0.02031(13) Uani 1 1 d . . . 
H2 H 0.5261 0.4797 -0.9898 0.050 Uiso 1 1 d . . . 
H1 H 0.5485 0.5208 -0.7817 0.050 Uiso 1 1 d . . . 
Ru2 Ru 0.61982(4) 0.58228(2) -0.82709(5) 0.02107(14) Uani 1 1 d . . . 
H3 H 0.6754 0.5229 -0.8988 0.050 Uiso 1 1 d . . . 
Ru3 Ru 0.57549(4) 0.53568(2) -1.07043(5) 0.01954(13) Uani 1 1 d . . . 
Ru4 Ru -0.05069(4) 0.84300(2) -0.39925(5) 0.02223(14) Uani 1 1 d . . . 
H5 H 0.0236 0.8776 -0.5118 0.050 Uiso 1 1 d . . . 
Ru5 Ru 0.11878(4) 0.77929(2) -0.34536(5) 0.02208(14) Uani 1 1 d . . . 
H6 H 0.1605 0.8207 -0.4658 0.050 Uiso 1 1 d . . . 
H4 H 0.1013 0.8306 -0.3010 0.050 Uiso 1 1 d . . . 
Ru6 Ru 0.07595(4) 0.82690(2) -0.58931(5) 0.02090(14) Uani 1 1 d . . . 
  
loop_ 
 _atom_site_aniso_label 
 _atom_site_aniso_U_11 
 _atom_site_aniso_U_22 
 _atom_site_aniso_U_33 
 _atom_site_aniso_U_23 
 _atom_site_aniso_U_13 
 _atom_site_aniso_U_12 
C1 0.015(2) 0.054(3) 0.035(2) -0.0097(19) -0.0018(19) 0.000(2) 
C2 0.015(2) 0.054(3) 0.035(2) -0.0097(19) -0.0018(19) 0.000(2) 
C3 0.015(2) 0.054(3) 0.035(2) -0.0097(19) -0.0018(19) 0.000(2) 
C4 0.031(5) 0.043(5) 0.031(4) -0.012(3) 0.007(3) -0.011(4) 
C5 0.028(5) 0.047(5) 0.026(4) -0.003(3) 0.010(3) -0.011(4) 
C6 0.011(4) 0.048(5) 0.040(4) -0.004(3) 0.007(3) -0.009(3) 
C7 0.041(6) 0.060(6) 0.079(7) -0.041(5) 0.005(5) -0.020(5) 
C8 0.035(6) 0.150(12) 0.035(5) 0.002(6) -0.010(4) -0.001(7) 
C9 0.029(6) 0.055(6) 0.115(9) 0.013(6) 0.004(6) 0.015(5) 
C10 0.068(8) 0.053(6) 0.082(7) -0.048(5) 0.030(6) -0.021(6) 
C11 0.043(6) 0.085(7) 0.038(5) 0.000(4) 0.001(4) -0.022(5) 
C12 0.052(7) 0.040(6) 0.096(8) 0.016(5) 0.017(6) 0.002(5) 
C13 0.023(2) 0.042(2) 0.0259(17) 0.0014(14) -0.0117(17) -0.0138(18) 
C14 0.023(2) 0.042(2) 0.0259(17) 0.0014(14) -0.0117(17) -0.0138(18) 
C15 0.043(6) 0.024(4) 0.033(4) -0.010(3) -0.020(4) 0.001(4) 
C16 0.050(6) 0.021(4) 0.036(4) -0.001(3) -0.016(4) -0.013(4) 
C17 0.023(2) 0.042(2) 0.0259(17) 0.0014(14) -0.0117(17) -0.0138(18) 
C18 0.023(2) 0.042(2) 0.0259(17) 0.0014(14) -0.0117(17) -0.0138(18) 
C19 0.021(4) 0.039(5) 0.035(4) 0.003(3) 0.004(3) 0.005(3) 
C20 0.033(5) 0.033(5) 0.047(5) 0.007(3) -0.012(4) -0.003(4) 
C21 0.038(5) 0.065(6) 0.038(4) 0.007(4) -0.018(4) 0.000(5) 
C22 0.085(9) 0.025(5) 0.052(5) -0.005(3) -0.034(5) 0.005(5) 
C23 0.037(4) 0.046(5) 0.024(3) 0.013(3) 0.003(3) 0.000(3) 
C24 0.030(3) 0.048(3) 0.026(2) 0.003(2) 0.014(2) -0.002(3) 
C25 0.030(3) 0.048(3) 0.026(2) 0.003(2) 0.014(2) -0.002(3) 
C26 0.052(6) 0.039(5) 0.024(4) -0.011(3) 0.008(4) 0.014(4) 
C27 0.036(5) 0.052(5) 0.015(3) -0.012(3) -0.001(3) -0.008(4) 
C28 0.042(5) 0.078(6) 0.015(3) 0.004(3) -0.011(3) 0.024(5) 
C29 0.037(4) 0.068(6) 0.041(5) 0.021(4) 0.000(4) 0.016(4) 
C30 0.041(4) 0.041(4) 0.051(5) 0.020(3) -0.004(4) 0.006(3) 
C31 0.030(5) 0.023(4) 0.058(5) -0.002(3) 0.010(4) 0.013(3) 
C32 0.014(4) 0.054(5) 0.036(4) 0.008(3) 0.005(3) 0.006(3) 
C33 0.016(4) 0.036(4) 0.062(5) 0.024(4) 0.019(4) 0.004(3) 
C34 0.017(3) 0.067(4) 0.052(3) 0.008(2) 0.003(2) 0.007(2) 
C35 0.017(3) 0.067(4) 0.052(3) 0.008(2) 0.003(2) 0.007(2) 
C36 0.017(3) 0.067(4) 0.052(3) 0.008(2) 0.003(2) 0.007(2) 
C37 0.050(7) 0.032(5) 0.120(9) -0.002(5) 0.037(6) 0.010(5) 
C38 0.028(5) 0.124(9) 0.042(5) -0.019(5) 0.002(4) -0.004(5) 
C39 0.070(9) 0.095(10) 0.103(10) 0.064(8) 0.050(7) 0.020(7) 
C40 0.055(8) 0.086(9) 0.146(12) -0.045(8) 0.049(8) -0.048(7) 
C41 0.023(5) 0.181(14) 0.053(6) -0.012(7) -0.005(5) 0.002(7) 
C42 0.065(8) 0.112(11) 0.083(8) 0.070(8) 0.023(7) 0.035(8) 
C43 0.031(3) 0.044(3) 0.033(2) -0.0052(18) -0.012(2) 0.018(2) 
C44 0.031(3) 0.044(3) 0.033(2) -0.0052(18) -0.012(2) 0.018(2) 
C45 0.031(3) 0.044(3) 0.033(2) -0.0052(18) -0.012(2) 0.018(2) 
C46 0.078(8) 0.021(4) 0.043(4) -0.002(3) -0.033(5) 0.017(5) 
C47 0.043(6) 0.030(5) 0.041(4) 0.015(3) -0.016(4) -0.005(4) 
C48 0.039(4) 0.019(3) 0.023(3) 0.007(2) -0.004(3) -0.004(3) 
C49 0.025(4) 0.041(5) 0.030(3) 0.004(3) -0.008(3) -0.005(4) 
C50 0.028(5) 0.046(5) 0.048(4) -0.009(4) -0.015(4) 0.002(4) 
C51 0.045(6) 0.033(5) 0.057(5) -0.013(4) -0.012(4) -0.009(4) 
C52 0.124(12) 0.026(5) 0.072(6) -0.012(4) -0.040(7) 0.007(6) 
C53 0.050(5) 0.035(4) 0.040(5) -0.022(3) -0.004(4) 0.009(4) 
C54 0.034(5) 0.060(5) 0.024(3) -0.011(3) -0.010(3) 0.008(4) 
C55 0.049(5) 0.035(4) 0.015(3) 0.011(3) 0.005(3) -0.002(3) 
C56 0.042(6) 0.037(4) 0.034(4) 0.012(3) 0.012(4) -0.008(4) 
C57 0.035(5) 0.071(6) 0.028(4) 0.001(4) 0.008(4) -0.019(4) 
C58 0.042(5) 0.044(4) 0.027(4) 0.001(3) 0.001(4) 0.013(4) 
C59 0.061(6) 0.055(6) 0.094(8) -0.011(5) -0.013(6) -0.007(5) 
C60 0.151(14) 0.082(9) 0.083(8) 0.012(7) -0.035(9) -0.059(9) 
B1 0.032(5) 0.039(5) 0.077(7) -0.006(5) 0.011(5) -0.009(4) 
B2 0.048(6) 0.027(5) 0.067(7) 0.008(4) -0.009(5) 0.000(4) 
F1 0.076(2) 0.067(2) 0.169(4) 0.011(2) -0.003(2) 0.0001(19) 
F2 0.076(2) 0.067(2) 0.169(4) 0.011(2) -0.003(2) 0.0001(19) 
F3 0.076(2) 0.067(2) 0.169(4) 0.011(2) -0.003(2) 0.0001(19) 
F4 0.076(2) 0.067(2) 0.169(4) 0.011(2) -0.003(2) 0.0001(19) 
F5 0.035(3) 0.069(3) 0.089(4) -0.035(3) 0.020(3) 0.000(2) 
F6 0.151(7) 0.072(4) 0.066(4) 0.022(3) 0.000(4) 0.038(4) 
F7 0.021(2) 0.066(3) 0.085(4) 0.005(3) 0.004(2) 0.009(2) 
F8 0.048(3) 0.036(3) 0.123(5) -0.010(3) -0.025(3) -0.009(2) 
O1 0.023(3) 0.026(3) 0.023(2) -0.0022(18) 0.000(2) 0.002(2) 
O2 0.058(4) 0.062(4) 0.050(3) 0.015(3) 0.014(3) 0.039(3) 
O3 0.022(3) 0.021(3) 0.030(3) 0.0049(18) -0.002(2) -0.006(2) 
O4 0.138(8) 0.092(6) 0.105(7) 0.009(5) -0.060(6) -0.036(6) 
Ru1 0.0161(3) 0.0241(3) 0.0204(2) -0.00601(19) -0.0009(2) -0.0004(2) 
Ru2 0.0189(3) 0.0220(3) 0.0216(2) 0.0000(2) -0.0045(2) -0.0022(2) 
Ru3 0.0183(3) 0.0202(3) 0.0199(2) -0.00069(19) -0.0003(2) 0.0033(2) 
Ru4 0.0152(3) 0.0262(3) 0.0252(3) 0.0054(2) 0.0002(2) -0.0002(2) 
Ru5 0.0210(3) 0.0214(3) 0.0233(3) 0.00116(19) -0.0030(2) 0.0011(2) 
Ru6 0.0180(3) 0.0229(3) 0.0215(3) 0.00055(19) -0.0010(2) -0.0037(2) 
  
_geom_special_details 
; 
 All esds (except the esd in the dihedral angle between two l.s. planes) 
 are estimated using the full covariance matrix.  The cell esds are taken 
 into account individually in the estimation of esds in distances, angles 
 and torsion angles; correlations between esds in cell parameters are only 
 used when they are defined by crystal symmetry.  An approximate (isotropic) 
 treatment of cell esds is used for estimating esds involving l.s. planes. 
; 
  
loop_ 
 _geom_bond_atom_site_label_1 
 _geom_bond_atom_site_label_2 
 _geom_bond_distance 
 _geom_bond_site_symmetry_2 
 _geom_bond_publ_flag 
C1 C6 1.414(11) . ? 
C1 C2 1.423(11) . ? 
C1 C7 1.511(12) . ? 
C1 Ru1 2.195(8) . ? 
C2 C3 1.483(11) . ? 
C2 C8 1.495(10) . ? 
C2 Ru1 2.216(7) . ? 
C3 C4 1.459(10) . ? 
C3 C9 1.477(13) . ? 
C3 Ru1 2.198(8) . ? 
C4 C5 1.422(12) . ? 
C4 C10 1.516(11) . ? 
C4 Ru1 2.185(9) . ? 
C5 C6 1.415(12) . ? 
C5 C11 1.519(11) . ? 
C5 Ru1 2.216(8) . ? 
C6 C12 1.499(13) . ? 
C6 Ru1 2.240(9) . ? 
C7 H7A 0.9800 . ? 
C7 H7B 0.9800 . ? 
C7 H7C 0.9800 . ? 
C8 H8A 0.9800 . ? 
C8 H8B 0.9800 . ? 
C8 H8C 0.9800 . ? 
C9 H9A 0.9800 . ? 
C9 H9B 0.9800 . ? 
C9 H9C 0.9800 . ? 
C10 H10A 0.9800 . ? 
C10 H10B 0.9800 . ? 
C10 H10C 0.9800 . ? 
C11 H11A 0.9800 . ? 
C11 H11B 0.9800 . ? 
C11 H11C 0.9800 . ? 
C12 H12A 0.9800 . ? 
C12 H12B 0.9800 . ? 
C12 H12C 0.9800 . ? 
C13 C18 1.432(11) . ? 
C13 C14 1.452(12) . ? 
C13 C19 1.489(11) . ? 
C13 Ru2 2.246(6) . ? 
C14 C15 1.405(10) . ? 
C14 Ru2 2.182(6) . ? 
C14 H14A 0.9500 . ? 
C15 C16 1.400(12) . ? 
C15 Ru2 2.184(7) . ? 
C15 H15A 0.9500 . ? 
C16 C17 1.434(13) . ? 
C16 C22 1.517(11) . ? 
C16 Ru2 2.201(7) . ? 
C17 C18 1.397(11) . ? 
C17 Ru2 2.220(8) . ? 
C17 H17A 0.9500 . ? 
C18 Ru2 2.194(8) . ? 
C18 H18A 0.9500 . ? 
C19 C20 1.530(12) . ? 
C19 C21 1.557(10) . ? 
C19 H19A 1.0000 . ? 
C20 H20A 0.9800 . ? 
C20 H20B 0.9800 . ? 
C20 H20C 0.9800 . ? 
C21 H21A 0.9800 . ? 
C21 H21B 0.9800 . ? 
C21 H21C 0.9800 . ? 
C22 H22A 0.9800 . ? 
C22 H22B 0.9800 . ? 
C22 H22C 0.9800 . ? 
C23 C24 1.399(12) . ? 
C23 C28 1.453(13) . ? 
C23 C29 1.569(12) . ? 
C23 Ru3 2.179(7) . ? 
C24 C25 1.421(13) . ? 
C24 Ru3 2.204(9) . ? 
C24 H24A 0.9500 . ? 
C25 C26 1.381(13) . ? 
C25 Ru3 2.188(9) . ? 
C25 H25A 0.9500 . ? 
C26 C27 1.434(13) . ? 
C26 Ru3 2.214(8) . ? 
C26 H26A 0.9500 . ? 
C27 C28 1.394(12) . ? 
C27 Ru3 2.189(7) . ? 
C27 H27A 0.9500 . ? 
C28 Ru3 2.212(6) . ? 
C28 H28A 0.9500 . ? 
C29 O2 1.407(11) . ? 
C29 C30 1.531(10) . ? 
C29 H29A 1.0000 . ? 
C30 H30A 0.9800 . ? 
C30 H30B 0.9800 . ? 
C30 H30C 0.9800 . ? 
C31 C36 1.413(12) . ? 
C31 C32 1.423(12) . ? 
C31 C37 1.520(13) . ? 
C31 Ru4 2.250(8) . ? 
C32 C33 1.445(12) . ? 
C32 C38 1.532(11) . ? 
C32 Ru4 2.176(9) . ? 
C33 C34 1.419(12) . ? 
C33 C39 1.519(12) . ? 
C33 Ru4 2.228(8) . ? 
C34 C35 1.387(13) . ? 
C34 C40 1.520(14) . ? 
C34 Ru4 2.180(9) . ? 
C35 C36 1.403(13) . ? 
C35 C41 1.522(12) . ? 
C35 Ru4 2.233(8) . ? 
C36 C42 1.532(13) . ? 
C36 Ru4 2.197(9) . ? 
C37 H37A 0.9800 . ? 
C37 H37B 0.9800 . ? 
C37 H37C 0.9800 . ? 
C38 H38A 0.9800 . ? 
C38 H38B 0.9800 . ? 
C38 H38C 0.9800 . ? 
C39 H39A 0.9800 . ? 
C39 H39B 0.9800 . ? 
C39 H39C 0.9800 . ? 
C40 H40A 0.9800 . ? 
C40 H40B 0.9800 . ? 
C40 H40C 0.9800 . ? 
C41 H41A 0.9800 . ? 
C41 H41B 0.9800 . ? 
C41 H41C 0.9800 . ? 
C42 H42A 0.9800 . ? 
C42 H42B 0.9800 . ? 
C42 H42C 0.9800 . ? 
C43 C48 1.402(12) . ? 
C43 C44 1.435(11) . ? 
C43 C49 1.523(11) . ? 
C43 Ru5 2.244(7) . ? 
C44 C45 1.452(12) . ? 
C44 Ru5 2.193(8) . ? 
C44 H44A 0.9500 . ? 
C45 C46 1.364(14) . ? 
C45 Ru5 2.191(8) . ? 
C45 H45A 0.9500 . ? 
C46 C47 1.432(14) . ? 
C46 C52 1.507(12) . ? 
C46 Ru5 2.216(8) . ? 
C47 C48 1.434(11) . ? 
C47 Ru5 2.240(8) . ? 
C47 H47A 0.9500 . ? 
C48 Ru5 2.199(6) . ? 
C48 H48A 0.9500 . ? 
C49 C51 1.506(13) . ? 
C49 C50 1.545(9) . ? 
C49 H49A 1.0000 . ? 
C50 H50A 0.9800 . ? 
C50 H50B 0.9800 . ? 
C50 H50C 0.9800 . ? 
C51 H51A 0.9800 . ? 
C51 H51B 0.9800 . ? 
C51 H51C 0.9800 . ? 
C52 H52A 0.9800 . ? 
C52 H52B 0.9800 . ? 
C52 H52C 0.9800 . ? 
C53 C54 1.380(12) . ? 
C53 C58 1.420(13) . ? 
C53 C59 1.504(12) . ? 
C53 Ru6 2.247(7) . ? 
C54 C55 1.434(12) . ? 
C54 Ru6 2.226(6) . ? 
C54 H54A 0.9500 . ? 
C55 C56 1.363(13) . ? 
C55 Ru6 2.192(7) . ? 
C55 H55A 0.9500 . ? 
C56 C57 1.418(14) . ? 
C56 Ru6 2.222(8) . ? 
C56 H56A 0.9500 . ? 
C57 C58 1.395(12) . ? 
C57 Ru6 2.173(9) . ? 
C57 H57A 0.9500 . ? 
C58 Ru6 2.202(9) . ? 
C58 H58A 0.9500 . ? 
C59 C60 1.368(16) . ? 
C59 O4 1.416(12) . ? 
C59 H59A 1.0000 . ? 
C60 H60A 0.9800 . ? 
C60 H60B 0.9800 . ? 
C60 H60C 0.9800 . ? 
B1 F4 1.326(14) . ? 
B1 F2 1.338(13) . ? 
B1 F3 1.370(14) . ? 
B1 F1 1.380(13) . ? 
B2 F8 1.361(11) . ? 
B2 F7 1.378(13) . ? 
B2 F5 1.382(13) . ? 
B2 F6 1.418(12) . ? 
O1 Ru3 1.994(5) . ? 
O1 Ru1 2.001(5) . ? 
O1 Ru2 2.001(4) . ? 
O2 H2A 0.8400 . ? 
O3 Ru4 1.990(5) . ? 
O3 Ru5 1.994(4) . ? 
O3 Ru6 2.004(5) . ? 
O4 H4A 0.8400 . ? 
Ru1 Ru3 2.7572(9) . ? 
Ru1 Ru2 2.7690(8) . ? 
Ru1 H2 1.7757 . ? 
Ru1 H1 1.6288 . ? 
Ru2 Ru3 2.7413(7) . ? 
Ru2 H1 1.7270 . ? 
Ru2 H3 1.6803 . ? 
Ru3 H2 1.6324 . ? 
Ru4 Ru6 2.7444(9) . ? 
Ru4 Ru5 2.7491(9) . ? 
Ru4 H5 1.7669 . ? 
Ru5 Ru6 2.7515(7) . ? 
Ru5 H6 1.6616 . ? 
Ru5 H4 1.2165 . ? 
Ru6 H5 1.5543 . ? 
Ru6 H6 1.6878 . ? 
  
loop_ 
 _geom_angle_atom_site_label_1 
 _geom_angle_atom_site_label_2 
 _geom_angle_atom_site_label_3 
 _geom_angle 
 _geom_angle_site_symmetry_1 
 _geom_angle_site_symmetry_3 
 _geom_angle_publ_flag 
C6 C1 C2 121.6(7) . . ? 
C6 C1 C7 120.1(9) . . ? 
C2 C1 C7 118.3(7) . . ? 
C6 C1 Ru1 73.1(5) . . ? 
C2 C1 Ru1 72.0(4) . . ? 
C7 C1 Ru1 127.4(7) . . ? 
C1 C2 C3 119.2(6) . . ? 
C1 C2 C8 125.2(8) . . ? 
C3 C2 C8 115.6(9) . . ? 
C1 C2 Ru1 70.4(4) . . ? 
C3 C2 Ru1 69.7(4) . . ? 
C8 C2 Ru1 130.8(7) . . ? 
C4 C3 C9 123.1(8) . . ? 
C4 C3 C2 117.8(7) . . ? 
C9 C3 C2 119.0(7) . . ? 
C4 C3 Ru1 70.1(5) . . ? 
C9 C3 Ru1 127.1(7) . . ? 
C2 C3 Ru1 71.0(4) . . ? 
C5 C4 C3 120.2(7) . . ? 
C5 C4 C10 122.1(8) . . ? 
C3 C4 C10 117.5(9) . . ? 
C5 C4 Ru1 72.3(5) . . ? 
C3 C4 Ru1 71.0(5) . . ? 
C10 C4 Ru1 132.4(7) . . ? 
C6 C5 C4 121.2(7) . . ? 
C6 C5 C11 117.9(9) . . ? 
C4 C5 C11 120.8(8) . . ? 
C6 C5 Ru1 72.4(5) . . ? 
C4 C5 Ru1 70.0(5) . . ? 
C11 C5 Ru1 128.3(7) . . ? 
C1 C6 C5 119.9(8) . . ? 
C1 C6 C12 118.5(8) . . ? 
C5 C6 C12 121.6(8) . . ? 
C1 C6 Ru1 69.7(5) . . ? 
C5 C6 Ru1 70.6(5) . . ? 
C12 C6 Ru1 133.4(7) . . ? 
C1 C7 H7A 109.5 . . ? 
C1 C7 H7B 109.5 . . ? 
H7A C7 H7B 109.5 . . ? 
C1 C7 H7C 109.5 . . ? 
H7A C7 H7C 109.5 . . ? 
H7B C7 H7C 109.5 . . ? 
C2 C8 H8A 109.5 . . ? 
C2 C8 H8B 109.5 . . ? 
H8A C8 H8B 109.5 . . ? 
C2 C8 H8C 109.5 . . ? 
H8A C8 H8C 109.5 . . ? 
H8B C8 H8C 109.5 . . ? 
C3 C9 H9A 109.5 . . ? 
C3 C9 H9B 109.5 . . ? 
H9A C9 H9B 109.5 . . ? 
C3 C9 H9C 109.5 . . ? 
H9A C9 H9C 109.5 . . ? 
H9B C9 H9C 109.5 . . ? 
C4 C10 H10A 109.5 . . ? 
C4 C10 H10B 109.5 . . ? 
H10A C10 H10B 109.5 . . ? 
C4 C10 H10C 109.5 . . ? 
H10A C10 H10C 109.5 . . ? 
H10B C10 H10C 109.5 . . ? 
C5 C11 H11A 109.5 . . ? 
C5 C11 H11B 109.5 . . ? 
H11A C11 H11B 109.5 . . ? 
C5 C11 H11C 109.5 . . ? 
H11A C11 H11C 109.5 . . ? 
H11B C11 H11C 109.5 . . ? 
C6 C12 H12A 109.5 . . ? 
C6 C12 H12B 109.5 . . ? 
H12A C12 H12B 109.5 . . ? 
C6 C12 H12C 109.5 . . ? 
H12A C12 H12C 109.5 . . ? 
H12B C12 H12C 109.5 . . ? 
C18 C13 C14 115.7(7) . . ? 
C18 C13 C19 120.9(8) . . ? 
C14 C13 C19 123.3(7) . . ? 
C18 C13 Ru2 69.2(4) . . ? 
C14 C13 Ru2 68.5(4) . . ? 
C19 C13 Ru2 130.3(5) . . ? 
C15 C14 C13 120.5(7) . . ? 
C15 C14 Ru2 71.3(4) . . ? 
C13 C14 Ru2 73.3(4) . . ? 
C15 C14 H14A 119.7 . . ? 
C13 C14 H14A 119.7 . . ? 
Ru2 C14 H14A 127.9 . . ? 
C16 C15 C14 122.9(9) . . ? 
C16 C15 Ru2 72.1(4) . . ? 
C14 C15 Ru2 71.1(4) . . ? 
C16 C15 H15A 118.5 . . ? 
C14 C15 H15A 118.5 . . ? 
Ru2 C15 H15A 131.3 . . ? 
C15 C16 C17 117.0(7) . . ? 
C15 C16 C22 121.1(9) . . ? 
C17 C16 C22 121.9(8) . . ? 
C15 C16 Ru2 70.7(4) . . ? 
C17 C16 Ru2 71.8(5) . . ? 
C22 C16 Ru2 126.8(5) . . ? 
C18 C17 C16 120.9(7) . . ? 
C18 C17 Ru2 70.5(4) . . ? 
C16 C17 Ru2 70.4(4) . . ? 
C18 C17 H17A 119.5 . . ? 
C16 C17 H17A 119.5 . . ? 
Ru2 C17 H17A 132.8 . . ? 
C17 C18 C13 122.6(8) . . ? 
C17 C18 Ru2 72.6(4) . . ? 
C13 C18 Ru2 73.2(4) . . ? 
C17 C18 H18A 118.7 . . ? 
C13 C18 H18A 118.7 . . ? 
Ru2 C18 H18A 127.8 . . ? 
C13 C19 C20 114.1(7) . . ? 
C13 C19 C21 107.5(7) . . ? 
C20 C19 C21 111.4(7) . . ? 
C13 C19 H19A 107.8 . . ? 
C20 C19 H19A 107.8 . . ? 
C21 C19 H19A 107.8 . . ? 
C19 C20 H20A 109.5 . . ? 
C19 C20 H20B 109.5 . . ? 
H20A C20 H20B 109.5 . . ? 
C19 C20 H20C 109.5 . . ? 
H20A C20 H20C 109.5 . . ? 
H20B C20 H20C 109.5 . . ? 
C19 C21 H21A 109.5 . . ? 
C19 C21 H21B 109.5 . . ? 
H21A C21 H21B 109.5 . . ? 
C19 C21 H21C 109.5 . . ? 
H21A C21 H21C 109.5 . . ? 
H21B C21 H21C 109.5 . . ? 
C16 C22 H22A 109.5 . . ? 
C16 C22 H22B 109.5 . . ? 
H22A C22 H22B 109.5 . . ? 
C16 C22 H22C 109.5 . . ? 
H22A C22 H22C 109.5 . . ? 
H22B C22 H22C 109.5 . . ? 
C24 C23 C28 119.4(8) . . ? 
C24 C23 C29 118.4(8) . . ? 
C28 C23 C29 121.8(8) . . ? 
C24 C23 Ru3 72.4(4) . . ? 
C28 C23 Ru3 71.9(4) . . ? 
C29 C23 Ru3 121.4(6) . . ? 
C23 C24 C25 119.3(8) . . ? 
C23 C24 Ru3 70.4(5) . . ? 
C25 C24 Ru3 70.5(5) . . ? 
C23 C24 H24A 120.4 . . ? 
C25 C24 H24A 120.4 . . ? 
Ru3 C24 H24A 131.4 . . ? 
C26 C25 C24 121.6(8) . . ? 
C26 C25 Ru3 72.8(5) . . ? 
C24 C25 Ru3 71.8(5) . . ? 
C26 C25 H25A 119.2 . . ? 
C24 C25 H25A 119.2 . . ? 
Ru3 C25 H25A 128.7 . . ? 
C25 C26 C27 119.9(8) . . ? 
C25 C26 Ru3 70.7(5) . . ? 
C27 C26 Ru3 70.0(5) . . ? 
C25 C26 H26A 120.1 . . ? 
C27 C26 H26A 120.1 . . ? 
Ru3 C26 H26A 132.1 . . ? 
C28 C27 C26 119.4(8) . . ? 
C28 C27 Ru3 72.4(4) . . ? 
C26 C27 Ru3 71.9(4) . . ? 
C28 C27 H27A 120.3 . . ? 
C26 C27 H27A 120.3 . . ? 
Ru3 C27 H27A 127.3 . . ? 
C27 C28 C23 120.1(8) . . ? 
C27 C28 Ru3 70.6(4) . . ? 
C23 C28 Ru3 69.5(4) . . ? 
C27 C28 H28A 120.0 . . ? 
C23 C28 H28A 120.0 . . ? 
Ru3 C28 H28A 133.1 . . ? 
O2 C29 C30 107.8(6) . . ? 
O2 C29 C23 109.8(7) . . ? 
C30 C29 C23 107.9(7) . . ? 
O2 C29 H29A 110.4 . . ? 
C30 C29 H29A 110.4 . . ? 
C23 C29 H29A 110.4 . . ? 
C29 C30 H30A 109.5 . . ? 
C29 C30 H30B 109.5 . . ? 
H30A C30 H30B 109.5 . . ? 
C29 C30 H30C 109.5 . . ? 
H30A C30 H30C 109.5 . . ? 
H30B C30 H30C 109.5 . . ? 
C36 C31 C32 118.0(8) . . ? 
C36 C31 C37 121.1(9) . . ? 
C32 C31 C37 120.6(8) . . ? 
C36 C31 Ru4 69.5(5) . . ? 
C32 C31 Ru4 68.5(5) . . ? 
C37 C31 Ru4 129.7(7) . . ? 
C31 C32 C33 120.4(7) . . ? 
C31 C32 C38 119.0(9) . . ? 
C33 C32 C38 120.5(8) . . ? 
C31 C32 Ru4 74.1(5) . . ? 
C33 C32 Ru4 72.8(5) . . ? 
C38 C32 Ru4 129.2(7) . . ? 
C34 C33 C32 117.7(7) . . ? 
C34 C33 C39 123.7(10) . . ? 
C32 C33 C39 118.4(9) . . ? 
C34 C33 Ru4 69.4(5) . . ? 
C32 C33 Ru4 68.9(5) . . ? 
C39 C33 Ru4 129.9(7) . . ? 
C35 C34 C33 121.9(9) . . ? 
C35 C34 C40 121.4(9) . . ? 
C33 C34 C40 116.6(9) . . ? 
C35 C34 Ru4 73.8(5) . . ? 
C33 C34 Ru4 73.1(5) . . ? 
C40 C34 Ru4 125.5(7) . . ? 
C34 C35 C36 119.1(8) . . ? 
C34 C35 C41 120.7(10) . . ? 
C36 C35 C41 119.8(10) . . ? 
C34 C35 Ru4 69.6(5) . . ? 
C36 C35 Ru4 70.2(5) . . ? 
C41 C35 Ru4 127.1(7) . . ? 
C35 C36 C31 122.0(8) . . ? 
C35 C36 C42 118.8(9) . . ? 
C31 C36 C42 119.1(10) . . ? 
C35 C36 Ru4 72.9(5) . . ? 
C31 C36 Ru4 73.5(5) . . ? 
C42 C36 Ru4 127.7(8) . . ? 
C31 C37 H37A 109.5 . . ? 
C31 C37 H37B 109.5 . . ? 
H37A C37 H37B 109.5 . . ? 
C31 C37 H37C 109.5 . . ? 
H37A C37 H37C 109.5 . . ? 
H37B C37 H37C 109.5 . . ? 
C32 C38 H38A 109.5 . . ? 
C32 C38 H38B 109.5 . . ? 
H38A C38 H38B 109.5 . . ? 
C32 C38 H38C 109.5 . . ? 
H38A C38 H38C 109.5 . . ? 
H38B C38 H38C 109.5 . . ? 
C33 C39 H39A 109.5 . . ? 
C33 C39 H39B 109.5 . . ? 
H39A C39 H39B 109.5 . . ? 
C33 C39 H39C 109.5 . . ? 
H39A C39 H39C 109.5 . . ? 
H39B C39 H39C 109.5 . . ? 
C34 C40 H40A 109.5 . . ? 
C34 C40 H40B 109.5 . . ? 
H40A C40 H40B 109.5 . . ? 
C34 C40 H40C 109.5 . . ? 
H40A C40 H40C 109.5 . . ? 
H40B C40 H40C 109.5 . . ? 
C35 C41 H41A 109.5 . . ? 
C35 C41 H41B 109.5 . . ? 
H41A C41 H41B 109.5 . . ? 
C35 C41 H41C 109.5 . . ? 
H41A C41 H41C 109.5 . . ? 
H41B C41 H41C 109.5 . . ? 
C36 C42 H42A 109.5 . . ? 
C36 C42 H42B 109.5 . . ? 
H42A C42 H42B 109.5 . . ? 
C36 C42 H42C 109.5 . . ? 
H42A C42 H42C 109.5 . . ? 
H42B C42 H42C 109.5 . . ? 
C48 C43 C44 117.3(7) . . ? 
C48 C43 C49 123.6(7) . . ? 
C44 C43 C49 119.0(8) . . ? 
C48 C43 Ru5 69.9(4) . . ? 
C44 C43 Ru5 69.2(4) . . ? 
C49 C43 Ru5 131.1(5) . . ? 
C43 C44 C45 119.9(9) . . ? 
C43 C44 Ru5 73.1(5) . . ? 
C45 C44 Ru5 70.6(4) . . ? 
C43 C44 H44A 120.0 . . ? 
C45 C44 H44A 120.0 . . ? 
Ru5 C44 H44A 128.5 . . ? 
C46 C45 C44 120.8(8) . . ? 
C46 C45 Ru5 73.0(5) . . ? 
C44 C45 Ru5 70.7(4) . . ? 
C46 C45 H45A 119.6 . . ? 
C44 C45 H45A 119.6 . . ? 
Ru5 C45 H45A 129.1 . . ? 
C45 C46 C47 121.1(8) . . ? 
C45 C46 C52 120.5(10) . . ? 
C47 C46 C52 118.2(11) . . ? 
C45 C46 Ru5 71.0(5) . . ? 
C47 C46 Ru5 72.1(5) . . ? 
C52 C46 Ru5 126.7(6) . . ? 
C46 C47 C48 117.6(9) . . ? 
C46 C47 Ru5 70.4(5) . . ? 
C48 C47 Ru5 69.6(4) . . ? 
C46 C47 H47A 121.2 . . ? 
C48 C47 H47A 121.2 . . ? 
Ru5 C47 H47A 131.4 . . ? 
C43 C48 C47 123.2(8) . . ? 
C43 C48 Ru5 73.4(4) . . ? 
C47 C48 Ru5 72.7(4) . . ? 
C43 C48 H48A 118.4 . . ? 
C47 C48 H48A 118.4 . . ? 
Ru5 C48 H48A 127.8 . . ? 
C51 C49 C43 112.9(7) . . ? 
C51 C49 C50 110.9(7) . . ? 
C43 C49 C50 108.3(7) . . ? 
C51 C49 H49A 108.2 . . ? 
C43 C49 H49A 108.2 . . ? 
C50 C49 H49A 108.2 . . ? 
C49 C50 H50A 109.5 . . ? 
C49 C50 H50B 109.5 . . ? 
H50A C50 H50B 109.5 . . ? 
C49 C50 H50C 109.5 . . ? 
H50A C50 H50C 109.5 . . ? 
H50B C50 H50C 109.5 . . ? 
C49 C51 H51A 109.5 . . ? 
C49 C51 H51B 109.5 . . ? 
H51A C51 H51B 109.5 . . ? 
C49 C51 H51C 109.5 . . ? 
H51A C51 H51C 109.5 . . ? 
H51B C51 H51C 109.5 . . ? 
C46 C52 H52A 109.5 . . ? 
C46 C52 H52B 109.5 . . ? 
H52A C52 H52B 109.5 . . ? 
C46 C52 H52C 109.5 . . ? 
H52A C52 H52C 109.5 . . ? 
H52B C52 H52C 109.5 . . ? 
C54 C53 C58 118.9(7) . . ? 
C54 C53 C59 122.2(8) . . ? 
C58 C53 C59 118.8(8) . . ? 
C54 C53 Ru6 71.2(4) . . ? 
C58 C53 Ru6 69.7(4) . . ? 
C59 C53 Ru6 134.5(7) . . ? 
C53 C54 C55 119.9(8) . . ? 
C53 C54 Ru6 72.8(4) . . ? 
C55 C54 Ru6 69.8(4) . . ? 
C53 C54 H54A 120.0 . . ? 
C55 C54 H54A 120.0 . . ? 
Ru6 C54 H54A 129.8 . . ? 
C56 C55 C54 120.9(9) . . ? 
C56 C55 Ru6 73.2(5) . . ? 
C54 C55 Ru6 72.4(4) . . ? 
C56 C55 H55A 119.5 . . ? 
C54 C55 H55A 119.5 . . ? 
Ru6 C55 H55A 126.9 . . ? 
C55 C56 C57 119.6(8) . . ? 
C55 C56 Ru6 70.8(5) . . ? 
C57 C56 Ru6 69.3(5) . . ? 
C55 C56 H56A 120.2 . . ? 
C57 C56 H56A 120.2 . . ? 
Ru6 C56 H56A 132.6 . . ? 
C58 C57 C56 119.5(8) . . ? 
C58 C57 Ru6 72.5(5) . . ? 
C56 C57 Ru6 73.0(5) . . ? 
C58 C57 H57A 120.2 . . ? 
C56 C57 H57A 120.2 . . ? 
Ru6 C57 H57A 126.0 . . ? 
C57 C58 C53 120.8(8) . . ? 
C57 C58 Ru6 70.3(5) . . ? 
C53 C58 Ru6 73.1(5) . . ? 
C57 C58 H58A 119.6 . . ? 
C53 C58 H58A 119.6 . . ? 
Ru6 C58 H58A 129.5 . . ? 
C60 C59 O4 113.5(11) . . ? 
C60 C59 C53 113.6(10) . . ? 
O4 C59 C53 106.4(8) . . ? 
C60 C59 H59A 107.7 . . ? 
O4 C59 H59A 107.7 . . ? 
C53 C59 H59A 107.7 . . ? 
C59 C60 H60A 109.5 . . ? 
C59 C60 H60B 109.5 . . ? 
H60A C60 H60B 109.5 . . ? 
C59 C60 H60C 109.5 . . ? 
H60A C60 H60C 109.5 . . ? 
H60B C60 H60C 109.5 . . ? 
F4 B1 F2 111.4(10) . . ? 
F4 B1 F3 105.1(9) . . ? 
F2 B1 F3 112.5(10) . . ? 
F4 B1 F1 112.1(10) . . ? 
F2 B1 F1 108.6(8) . . ? 
F3 B1 F1 107.0(9) . . ? 
F8 B2 F7 110.7(8) . . ? 
F8 B2 F5 111.4(9) . . ? 
F7 B2 F5 111.5(8) . . ? 
F8 B2 F6 107.6(8) . . ? 
F7 B2 F6 109.0(10) . . ? 
F5 B2 F6 106.5(8) . . ? 
Ru3 O1 Ru1 87.3(2) . . ? 
Ru3 O1 Ru2 86.6(2) . . ? 
Ru1 O1 Ru2 87.57(18) . . ? 
C29 O2 H2A 109.5 . . ? 
Ru4 O3 Ru5 87.26(18) . . ? 
Ru4 O3 Ru6 86.80(19) . . ? 
Ru5 O3 Ru6 86.95(19) . . ? 
C59 O4 H4A 109.5 . . ? 
O1 Ru1 C4 111.0(3) . . ? 
O1 Ru1 C1 139.1(2) . . ? 
C4 Ru1 C1 81.4(3) . . ? 
O1 Ru1 C3 95.4(3) . . ? 
C4 Ru1 C3 38.9(3) . . ? 
C1 Ru1 C3 69.6(3) . . ? 
O1 Ru1 C2 108.2(3) . . ? 
C4 Ru1 C2 69.8(3) . . ? 
C1 Ru1 C2 37.6(3) . . ? 
C3 Ru1 C2 39.3(3) . . ? 
O1 Ru1 C5 143.8(3) . . ? 
C4 Ru1 C5 37.7(3) . . ? 
C1 Ru1 C5 67.5(3) . . ? 
C3 Ru1 C5 68.9(3) . . ? 
C2 Ru1 C5 80.6(3) . . ? 
O1 Ru1 C6 175.8(2) . . ? 
C4 Ru1 C6 67.9(3) . . ? 
C1 Ru1 C6 37.2(3) . . ? 
C3 Ru1 C6 81.2(3) . . ? 
C2 Ru1 C6 67.5(3) . . ? 
C5 Ru1 C6 37.0(3) . . ? 
O1 Ru1 Ru3 46.26(15) . . ? 
C4 Ru1 Ru3 156.9(2) . . ? 
C1 Ru1 Ru3 112.9(2) . . ? 
C3 Ru1 Ru3 127.0(2) . . ? 
C2 Ru1 Ru3 109.8(2) . . ? 
C5 Ru1 Ru3 163.8(2) . . ? 
C6 Ru1 Ru3 134.4(2) . . ? 
O1 Ru1 Ru2 46.22(12) . . ? 
C4 Ru1 Ru2 110.1(2) . . ? 
C1 Ru1 Ru2 165.5(2) . . ? 
C3 Ru1 Ru2 125.0(2) . . ? 
C2 Ru1 Ru2 153.8(2) . . ? 
C5 Ru1 Ru2 116.1(2) . . ? 
C6 Ru1 Ru2 138.0(2) . . ? 
Ru3 Ru1 Ru2 59.48(2) . . ? 
O1 Ru1 H2 80.5 . . ? 
C4 Ru1 H2 168.2 . . ? 
C1 Ru1 H2 88.0 . . ? 
C3 Ru1 H2 140.6 . . ? 
C2 Ru1 H2 104.6 . . ? 
C5 Ru1 H2 132.4 . . ? 
C6 Ru1 H2 100.4 . . ? 
Ru3 Ru1 H2 34.3 . . ? 
Ru2 Ru1 H2 79.6 . . ? 
O1 Ru1 H1 81.7 . . ? 
C4 Ru1 H1 97.9 . . ? 
C1 Ru1 H1 136.8 . . ? 
C3 Ru1 H1 132.4 . . ? 
C2 Ru1 H1 166.2 . . ? 
C5 Ru1 H1 85.8 . . ? 
C6 Ru1 H1 102.5 . . ? 
Ru3 Ru1 H1 84.0 . . ? 
Ru2 Ru1 H1 35.6 . . ? 
H2 Ru1 H1 86.2 . . ? 
O1 Ru2 C14 137.1(3) . . ? 
O1 Ru2 C15 107.8(3) . . ? 
C14 Ru2 C15 37.6(3) . . ? 
O1 Ru2 C18 145.3(2) . . ? 
C14 Ru2 C18 67.9(3) . . ? 
C15 Ru2 C18 79.2(3) . . ? 
O1 Ru2 C16 96.5(2) . . ? 
C14 Ru2 C16 68.4(3) . . ? 
C15 Ru2 C16 37.2(3) . . ? 
C18 Ru2 C16 68.2(3) . . ? 
O1 Ru2 C17 113.5(2) . . ? 
C14 Ru2 C17 79.6(3) . . ? 
C15 Ru2 C17 66.6(3) . . ? 
C18 Ru2 C17 36.9(3) . . ? 
C16 Ru2 C17 37.8(3) . . ? 
O1 Ru2 C13 175.3(3) . . ? 
C14 Ru2 C13 38.3(3) . . ? 
C15 Ru2 C13 68.1(3) . . ? 
C18 Ru2 C13 37.6(3) . . ? 
C16 Ru2 C13 81.6(3) . . ? 
C17 Ru2 C13 67.5(3) . . ? 
O1 Ru2 Ru3 46.57(14) . . ? 
C14 Ru2 Ru3 169.9(2) . . ? 
C15 Ru2 Ru3 151.29(19) . . ? 
C18 Ru2 Ru3 114.2(2) . . ? 
C16 Ru2 Ru3 121.66(19) . . ? 
C17 Ru2 Ru3 108.06(19) . . ? 
C13 Ru2 Ru3 138.0(2) . . ? 
O1 Ru2 Ru1 46.21(15) . . ? 
C14 Ru2 Ru1 114.5(2) . . ? 
C15 Ru2 Ru1 115.0(3) . . ? 
C18 Ru2 Ru1 160.4(2) . . ? 
C16 Ru2 Ru1 131.3(3) . . ? 
C17 Ru2 Ru1 159.67(18) . . ? 
C13 Ru2 Ru1 132.7(2) . . ? 
Ru3 Ru2 Ru1 60.05(2) . . ? 
O1 Ru2 H1 79.4 . . ? 
C14 Ru2 H1 88.8 . . ? 
C15 Ru2 H1 107.6 . . ? 
C18 Ru2 H1 132.1 . . ? 
C16 Ru2 H1 141.8 . . ? 
C17 Ru2 H1 166.8 . . ? 
C13 Ru2 H1 99.4 . . ? 
Ru3 Ru2 H1 82.8 . . ? 
Ru1 Ru2 H1 33.3 . . ? 
O1 Ru2 H3 99.0 . . ? 
C14 Ru2 H3 119.7 . . ? 
C15 Ru2 H3 152.9 . . ? 
C18 Ru2 H3 76.6 . . ? 
C16 Ru2 H3 137.1 . . ? 
C17 Ru2 H3 99.6 . . ? 
C13 Ru2 H3 85.2 . . ? 
Ru3 Ru2 H3 53.5 . . ? 
Ru1 Ru2 H3 86.3 . . ? 
H1 Ru2 H3 80.6 . . ? 
O1 Ru3 C23 95.4(3) . . ? 
O1 Ru3 C25 147.5(3) . . ? 
C23 Ru3 C25 67.7(3) . . ? 
O1 Ru3 C27 133.8(3) . . ? 
C23 Ru3 C27 68.8(3) . . ? 
C25 Ru3 C27 67.6(3) . . ? 
O1 Ru3 C24 113.2(3) . . ? 
C23 Ru3 C24 37.2(3) . . ? 
C25 Ru3 C24 37.8(3) . . ? 
C27 Ru3 C24 80.6(3) . . ? 
O1 Ru3 C28 105.2(3) . . ? 
C23 Ru3 C28 38.6(3) . . ? 
C25 Ru3 C28 79.3(3) . . ? 
C27 Ru3 C28 36.9(3) . . ? 
C24 Ru3 C28 67.8(3) . . ? 
O1 Ru3 C26 171.7(3) . . ? 
C23 Ru3 C26 80.2(3) . . ? 
C25 Ru3 C26 36.6(4) . . ? 
C27 Ru3 C26 38.0(3) . . ? 
C24 Ru3 C26 67.2(3) . . ? 
C28 Ru3 C26 67.0(3) . . ? 
O1 Ru3 Ru2 46.78(12) . . ? 
C23 Ru3 Ru2 118.7(2) . . ? 
C25 Ru3 Ru2 115.9(2) . . ? 
C27 Ru3 Ru2 172.3(2) . . ? 
C24 Ru3 Ru2 106.5(2) . . ? 
C28 Ru3 Ru2 148.5(2) . . ? 
C26 Ru3 Ru2 141.5(2) . . ? 
O1 Ru3 Ru1 46.46(15) . . ? 
C23 Ru3 Ru1 132.2(2) . . ? 
C25 Ru3 Ru1 159.9(2) . . ? 
C27 Ru3 Ru1 113.6(2) . . ? 
C24 Ru3 Ru1 159.7(2) . . ? 
C28 Ru3 Ru1 114.3(3) . . ? 
C26 Ru3 Ru1 132.9(3) . . ? 
Ru2 Ru3 Ru1 60.48(2) . . ? 
O1 Ru3 H2 84.2 . . ? 
C23 Ru3 H2 149.7 . . ? 
C25 Ru3 H2 124.6 . . ? 
C27 Ru3 H2 89.7 . . ? 
C24 Ru3 H2 162.3 . . ? 
C28 Ru3 H2 112.2 . . ? 
C26 Ru3 H2 96.0 . . ? 
Ru2 Ru3 H2 82.7 . . ? 
Ru1 Ru3 H2 37.8 . . ? 
O3 Ru4 C32 143.3(3) . . ? 
O3 Ru4 C34 96.5(3) . . ? 
C32 Ru4 C34 68.5(3) . . ? 
O3 Ru4 C36 138.8(3) . . ? 
C32 Ru4 C36 67.6(3) . . ? 
C34 Ru4 C36 66.7(3) . . ? 
O3 Ru4 C33 110.8(3) . . ? 
C32 Ru4 C33 38.3(3) . . ? 
C34 Ru4 C33 37.5(3) . . ? 
C36 Ru4 C33 79.3(3) . . ? 
O3 Ru4 C35 108.5(3) . . ? 
C32 Ru4 C35 79.9(3) . . ? 
C34 Ru4 C35 36.6(3) . . ? 
C36 Ru4 C35 36.9(3) . . ? 
C33 Ru4 C35 66.7(3) . . ? 
O3 Ru4 C31 175.1(3) . . ? 
C32 Ru4 C31 37.5(3) . . ? 
C34 Ru4 C31 79.4(4) . . ? 
C36 Ru4 C31 37.0(3) . . ? 
C33 Ru4 C31 67.5(3) . . ? 
C35 Ru4 C31 66.7(3) . . ? 
O3 Ru4 Ru6 46.82(14) . . ? 
C32 Ru4 Ru6 164.0(2) . . ? 
C34 Ru4 Ru6 127.1(2) . . ? 
C36 Ru4 Ru6 112.9(2) . . ? 
C33 Ru4 Ru6 156.7(2) . . ? 
C35 Ru4 Ru6 110.4(2) . . ? 
C31 Ru4 Ru6 134.1(2) . . ? 
O3 Ru4 Ru5 46.44(12) . . ? 
C32 Ru4 Ru5 115.6(2) . . ? 
C34 Ru4 Ru5 126.8(2) . . ? 
C36 Ru4 Ru5 166.5(3) . . ? 
C33 Ru4 Ru5 111.6(2) . . ? 
C35 Ru4 Ru5 154.0(3) . . ? 
C31 Ru4 Ru5 138.3(2) . . ? 
Ru6 Ru4 Ru5 60.11(2) . . ? 
O3 Ru4 H5 78.6 . . ? 
C32 Ru4 H5 135.0 . . ? 
C34 Ru4 H5 138.3 . . ? 
C36 Ru4 H5 89.8 . . ? 
C33 Ru4 H5 168.9 . . ? 
C35 Ru4 H5 105.3 . . ? 
C31 Ru4 H5 102.6 . . ? 
Ru6 Ru4 H5 31.8 . . ? 
Ru5 Ru4 H5 79.0 . . ? 
O3 Ru5 C45 112.0(2) . . ? 
O3 Ru5 C44 144.7(2) . . ? 
C45 Ru5 C44 38.7(3) . . ? 
O3 Ru5 C48 139.2(3) . . ? 
C45 Ru5 C48 79.4(3) . . ? 
C44 Ru5 C48 67.0(3) . . ? 
O3 Ru5 C46 98.2(3) . . ? 
C45 Ru5 C46 36.1(4) . . ? 
C44 Ru5 C46 67.5(4) . . ? 
C48 Ru5 C46 67.5(3) . . ? 
O3 Ru5 C47 108.8(3) . . ? 
C45 Ru5 C47 66.7(4) . . ? 
C44 Ru5 C47 79.9(4) . . ? 
C48 Ru5 C47 37.7(3) . . ? 
C46 Ru5 C47 37.5(4) . . ? 
O3 Ru5 C43 176.0(3) . . ? 
C45 Ru5 C43 68.6(3) . . ? 
C44 Ru5 C43 37.7(3) . . ? 
C48 Ru5 C43 36.8(3) . . ? 
C46 Ru5 C43 80.0(3) . . ? 
C47 Ru5 C43 67.6(3) . . ? 
O3 Ru5 Ru4 46.30(15) . . ? 
C45 Ru5 Ru4 158.2(2) . . ? 
C44 Ru5 Ru4 160.7(2) . . ? 
C48 Ru5 Ru4 114.8(2) . . ? 
C46 Ru5 Ru4 131.6(3) . . ? 
C47 Ru5 Ru4 113.7(3) . . ? 
C43 Ru5 Ru4 132.8(2) . . ? 
O3 Ru5 Ru6 46.68(14) . . ? 
C45 Ru5 Ru6 109.3(2) . . ? 
C44 Ru5 Ru6 114.0(2) . . ? 
C48 Ru5 Ru6 167.69(18) . . ? 
C46 Ru5 Ru6 124.7(2) . . ? 
C47 Ru5 Ru6 153.5(2) . . ? 
C43 Ru5 Ru6 137.2(2) . . ? 
Ru4 Ru5 Ru6 59.86(2) . . ? 
O3 Ru5 H6 81.5 . . ? 
C45 Ru5 H6 94.3 . . ? 
C44 Ru5 H6 82.4 . . ? 
C48 Ru5 H6 138.3 . . ? 
C46 Ru5 H6 126.5 . . ? 
C47 Ru5 H6 160.5 . . ? 
C43 Ru5 H6 102.5 . . ? 
Ru4 Ru5 H6 85.5 . . ? 
Ru6 Ru5 H6 35.1 . . ? 
O3 Ru5 H4 101.7 . . ? 
C45 Ru5 H4 145.6 . . ? 
C44 Ru5 H4 107.5 . . ? 
C48 Ru5 H4 79.5 . . ? 
C46 Ru5 H4 146.0 . . ? 
C47 Ru5 H4 109.2 . . ? 
C43 Ru5 H4 78.2 . . ? 
Ru4 Ru5 H4 56.2 . . ? 
Ru6 Ru5 H4 88.7 . . ? 
H6 Ru5 H4 83.9 . . ? 
O3 Ru6 C57 146.2(3) . . ? 
O3 Ru6 C55 138.9(3) . . ? 
C57 Ru6 C55 66.8(4) . . ? 
O3 Ru6 C58 115.0(3) . . ? 
C57 Ru6 C58 37.2(3) . . ? 
C55 Ru6 C58 78.6(3) . . ? 
O3 Ru6 C56 174.9(3) . . ? 
C57 Ru6 C56 37.6(4) . . ? 
C55 Ru6 C56 36.0(3) . . ? 
C58 Ru6 C56 66.6(3) . . ? 
O3 Ru6 C54 109.5(3) . . ? 
C57 Ru6 C54 79.1(3) . . ? 
C55 Ru6 C54 37.9(3) . . ? 
C58 Ru6 C54 66.0(3) . . ? 
C56 Ru6 C54 66.3(3) . . ? 
O3 Ru6 C53 100.1(3) . . ? 
C57 Ru6 C53 67.2(3) . . ? 
C55 Ru6 C53 66.5(3) . . ? 
C58 Ru6 C53 37.2(3) . . ? 
C56 Ru6 C53 78.3(3) . . ? 
C54 Ru6 C53 35.9(3) . . ? 
O3 Ru6 Ru4 46.38(15) . . ? 
C57 Ru6 Ru4 159.4(2) . . ? 
C55 Ru6 Ru4 114.0(3) . . ? 
C58 Ru6 Ru4 161.3(2) . . ? 
C56 Ru6 Ru4 131.7(3) . . ? 
C54 Ru6 Ru4 114.7(2) . . ? 
C53 Ru6 Ru4 133.0(3) . . ? 
O3 Ru6 Ru5 46.37(12) . . ? 
C57 Ru6 Ru5 114.5(2) . . ? 
C55 Ru6 Ru5 167.5(2) . . ? 
C58 Ru6 Ru5 110.25(19) . . ? 
C56 Ru6 Ru5 138.3(2) . . ? 
C54 Ru6 Ru5 153.4(2) . . ? 
C53 Ru6 Ru5 125.8(2) . . ? 
Ru4 Ru6 Ru5 60.03(2) . . ? 
O3 Ru6 H5 83.2 . . ? 
C57 Ru6 H5 126.0 . . ? 
C55 Ru6 H5 87.3 . . ? 
C58 Ru6 H5 161.8 . . ? 
C56 Ru6 H5 95.2 . . ? 
C54 Ru6 H5 108.9 . . ? 
C53 Ru6 H5 143.9 . . ? 
Ru4 Ru6 H5 36.9 . . ? 
Ru5 Ru6 H5 82.2 . . ? 
O3 Ru6 H6 80.6 . . ? 
C57 Ru6 H6 83.0 . . ? 
C55 Ru6 H6 139.3 . . ? 
C58 Ru6 H6 93.8 . . ? 
C56 Ru6 H6 104.3 . . ? 
C54 Ru6 H6 159.7 . . ? 
C53 Ru6 H6 126.6 . . ? 
Ru4 Ru6 H6 85.2 . . ? 
Ru5 Ru6 H6 34.5 . . ? 
H5 Ru6 H6 89.5 . . ? 
  
loop_ 
 _geom_torsion_atom_site_label_1 
 _geom_torsion_atom_site_label_2 
 _geom_torsion_atom_site_label_3 
 _geom_torsion_atom_site_label_4 
 _geom_torsion 
 _geom_torsion_site_symmetry_1 
 _geom_torsion_site_symmetry_2 
 _geom_torsion_site_symmetry_3 
 _geom_torsion_site_symmetry_4 
 _geom_torsion_publ_flag 
C6 C1 C2 C3 4.4(13) . . . . ? 
C7 C1 C2 C3 -175.1(8) . . . . ? 
Ru1 C1 C2 C3 -51.7(7) . . . . ? 
C6 C1 C2 C8 -177.2(9) . . . . ? 
C7 C1 C2 C8 3.3(14) . . . . ? 
Ru1 C1 C2 C8 126.7(9) . . . . ? 
C6 C1 C2 Ru1 56.1(8) . . . . ? 
C7 C1 C2 Ru1 -123.4(8) . . . . ? 
C1 C2 C3 C4 -2.0(12) . . . . ? 
C8 C2 C3 C4 179.5(8) . . . . ? 
Ru1 C2 C3 C4 -54.0(7) . . . . ? 
C1 C2 C3 C9 174.6(8) . . . . ? 
C8 C2 C3 C9 -3.9(12) . . . . ? 
Ru1 C2 C3 C9 122.6(8) . . . . ? 
C1 C2 C3 Ru1 52.0(7) . . . . ? 
C8 C2 C3 Ru1 -126.6(8) . . . . ? 
C9 C3 C4 C5 -177.2(9) . . . . ? 
C2 C3 C4 C5 -0.7(13) . . . . ? 
Ru1 C3 C4 C5 -55.1(8) . . . . ? 
C9 C3 C4 C10 6.6(14) . . . . ? 
C2 C3 C4 C10 -176.9(8) . . . . ? 
Ru1 C3 C4 C10 128.6(9) . . . . ? 
C9 C3 C4 Ru1 -122.0(9) . . . . ? 
C2 C3 C4 Ru1 54.4(7) . . . . ? 
C3 C4 C5 C6 1.2(14) . . . . ? 
C10 C4 C5 C6 177.2(9) . . . . ? 
Ru1 C4 C5 C6 -53.3(8) . . . . ? 
C3 C4 C5 C11 178.0(9) . . . . ? 
C10 C4 C5 C11 -6.0(14) . . . . ? 
Ru1 C4 C5 C11 123.4(9) . . . . ? 
C3 C4 C5 Ru1 54.5(8) . . . . ? 
C10 C4 C5 Ru1 -129.4(9) . . . . ? 
C2 C1 C6 C5 -4.0(13) . . . . ? 
C7 C1 C6 C5 175.5(9) . . . . ? 
Ru1 C1 C6 C5 51.5(8) . . . . ? 
C2 C1 C6 C12 175.2(8) . . . . ? 
C7 C1 C6 C12 -5.3(14) . . . . ? 
Ru1 C1 C6 C12 -129.3(9) . . . . ? 
C2 C1 C6 Ru1 -55.5(7) . . . . ? 
C7 C1 C6 Ru1 123.9(9) . . . . ? 
C4 C5 C6 C1 1.1(14) . . . . ? 
C11 C5 C6 C1 -175.7(8) . . . . ? 
Ru1 C5 C6 C1 -51.1(8) . . . . ? 
C4 C5 C6 C12 -178.0(9) . . . . ? 
C11 C5 C6 C12 5.1(14) . . . . ? 
Ru1 C5 C6 C12 129.7(9) . . . . ? 
C4 C5 C6 Ru1 52.3(8) . . . . ? 
C11 C5 C6 Ru1 -124.6(9) . . . . ? 
C18 C13 C14 C15 -3.3(9) . . . . ? 
C19 C13 C14 C15 179.6(6) . . . . ? 
Ru2 C13 C14 C15 -55.5(5) . . . . ? 
C18 C13 C14 Ru2 52.2(5) . . . . ? 
C19 C13 C14 Ru2 -124.9(6) . . . . ? 
C13 C14 C15 C16 3.9(10) . . . . ? 
Ru2 C14 C15 C16 -52.5(6) . . . . ? 
C13 C14 C15 Ru2 56.4(6) . . . . ? 
C14 C15 C16 C17 -4.5(10) . . . . ? 
Ru2 C15 C16 C17 -56.6(6) . . . . ? 
C14 C15 C16 C22 174.1(6) . . . . ? 
Ru2 C15 C16 C22 122.0(7) . . . . ? 
C14 C15 C16 Ru2 52.1(6) . . . . ? 
C15 C16 C17 C18 4.9(10) . . . . ? 
C22 C16 C17 C18 -173.7(6) . . . . ? 
Ru2 C16 C17 C18 -51.2(6) . . . . ? 
C15 C16 C17 Ru2 56.1(6) . . . . ? 
C22 C16 C17 Ru2 -122.5(7) . . . . ? 
C16 C17 C18 C13 -4.8(9) . . . . ? 
Ru2 C17 C18 C13 -55.9(6) . . . . ? 
C16 C17 C18 Ru2 51.1(6) . . . . ? 
C14 C13 C18 C17 3.8(9) . . . . ? 
C19 C13 C18 C17 -179.0(6) . . . . ? 
Ru2 C13 C18 C17 55.7(5) . . . . ? 
C14 C13 C18 Ru2 -51.8(5) . . . . ? 
C19 C13 C18 Ru2 125.4(6) . . . . ? 
C18 C13 C19 C20 -139.8(7) . . . . ? 
C14 C13 C19 C20 37.2(9) . . . . ? 
Ru2 C13 C19 C20 -51.8(10) . . . . ? 
C18 C13 C19 C21 96.1(8) . . . . ? 
C14 C13 C19 C21 -86.9(8) . . . . ? 
Ru2 C13 C19 C21 -175.9(6) . . . . ? 
C28 C23 C24 C25 -3.7(11) . . . . ? 
C29 C23 C24 C25 169.4(7) . . . . ? 
Ru3 C23 C24 C25 52.7(6) . . . . ? 
C28 C23 C24 Ru3 -56.4(6) . . . . ? 
C29 C23 C24 Ru3 116.7(7) . . . . ? 
C23 C24 C25 C26 2.6(11) . . . . ? 
Ru3 C24 C25 C26 55.3(7) . . . . ? 
C23 C24 C25 Ru3 -52.7(6) . . . . ? 
C24 C25 C26 C27 -3.0(11) . . . . ? 
Ru3 C25 C26 C27 51.8(7) . . . . ? 
C24 C25 C26 Ru3 -54.8(6) . . . . ? 
C25 C26 C27 C28 4.7(11) . . . . ? 
Ru3 C26 C27 C28 56.8(6) . . . . ? 
C25 C26 C27 Ru3 -52.1(7) . . . . ? 
C26 C27 C28 C23 -5.8(11) . . . . ? 
Ru3 C27 C28 C23 50.7(6) . . . . ? 
C26 C27 C28 Ru3 -56.5(6) . . . . ? 
C24 C23 C28 C27 5.4(11) . . . . ? 
C29 C23 C28 C27 -167.4(7) . . . . ? 
Ru3 C23 C28 C27 -51.2(7) . . . . ? 
C24 C23 C28 Ru3 56.6(6) . . . . ? 
C29 C23 C28 Ru3 -116.2(7) . . . . ? 
C24 C23 C29 O2 -131.2(8) . . . . ? 
C28 C23 C29 O2 41.7(10) . . . . ? 
Ru3 C23 C29 O2 -45.5(9) . . . . ? 
C24 C23 C29 C30 111.6(8) . . . . ? 
C28 C23 C29 C30 -75.5(9) . . . . ? 
Ru3 C23 C29 C30 -162.7(6) . . . . ? 
C36 C31 C32 C33 -8.0(13) . . . . ? 
C37 C31 C32 C33 177.2(8) . . . . ? 
Ru4 C31 C32 C33 -58.4(7) . . . . ? 
C36 C31 C32 C38 176.8(9) . . . . ? 
C37 C31 C32 C38 2.0(14) . . . . ? 
Ru4 C31 C32 C38 126.4(9) . . . . ? 
C36 C31 C32 Ru4 50.4(8) . . . . ? 
C37 C31 C32 Ru4 -124.4(9) . . . . ? 
C31 C32 C33 C34 8.0(12) . . . . ? 
C38 C32 C33 C34 -176.9(9) . . . . ? 
Ru4 C32 C33 C34 -51.0(7) . . . . ? 
C31 C32 C33 C39 -175.9(10) . . . . ? 
C38 C32 C33 C39 -0.8(13) . . . . ? 
Ru4 C32 C33 C39 125.0(9) . . . . ? 
C31 C32 C33 Ru4 59.1(8) . . . . ? 
C38 C32 C33 Ru4 -125.8(8) . . . . ? 
C32 C33 C34 C35 -6.9(13) . . . . ? 
C39 C33 C34 C35 177.3(10) . . . . ? 
Ru4 C33 C34 C35 -57.7(8) . . . . ? 
C32 C33 C34 C40 172.5(9) . . . . ? 
C39 C33 C34 C40 -3.2(14) . . . . ? 
Ru4 C33 C34 C40 121.8(9) . . . . ? 
C32 C33 C34 Ru4 50.8(7) . . . . ? 
C39 C33 C34 Ru4 -125.0(10) . . . . ? 
C33 C34 C35 C36 5.8(14) . . . . ? 
C40 C34 C35 C36 -173.6(9) . . . . ? 
Ru4 C34 C35 C36 -51.6(8) . . . . ? 
C33 C34 C35 C41 179.3(8) . . . . ? 
C40 C34 C35 C41 -0.1(14) . . . . ? 
Ru4 C34 C35 C41 121.9(9) . . . . ? 
C33 C34 C35 Ru4 57.4(8) . . . . ? 
C40 C34 C35 Ru4 -122.0(10) . . . . ? 
C34 C35 C36 C31 -5.8(14) . . . . ? 
C41 C35 C36 C31 -179.3(9) . . . . ? 
Ru4 C35 C36 C31 -57.1(8) . . . . ? 
C34 C35 C36 C42 175.4(10) . . . . ? 
C41 C35 C36 C42 1.9(14) . . . . ? 
Ru4 C35 C36 C42 124.1(9) . . . . ? 
C34 C35 C36 Ru4 51.3(8) . . . . ? 
C41 C35 C36 Ru4 -122.2(9) . . . . ? 
C32 C31 C36 C35 6.9(14) . . . . ? 
C37 C31 C36 C35 -178.4(9) . . . . ? 
Ru4 C31 C36 C35 56.9(8) . . . . ? 
C32 C31 C36 C42 -174.3(9) . . . . ? 
C37 C31 C36 C42 0.4(14) . . . . ? 
Ru4 C31 C36 C42 -124.4(9) . . . . ? 
C32 C31 C36 Ru4 -49.9(8) . . . . ? 
C37 C31 C36 Ru4 124.8(9) . . . . ? 
C48 C43 C44 C45 -2.5(10) . . . . ? 
C49 C43 C44 C45 178.7(6) . . . . ? 
Ru5 C43 C44 C45 -54.9(6) . . . . ? 
C48 C43 C44 Ru5 52.3(6) . . . . ? 
C49 C43 C44 Ru5 -126.5(6) . . . . ? 
C43 C44 C45 C46 0.8(10) . . . . ? 
Ru5 C44 C45 C46 -55.3(6) . . . . ? 
C43 C44 C45 Ru5 56.0(6) . . . . ? 
C44 C45 C46 C47 0.2(11) . . . . ? 
Ru5 C45 C46 C47 -54.1(7) . . . . ? 
C44 C45 C46 C52 176.3(7) . . . . ? 
Ru5 C45 C46 C52 122.1(7) . . . . ? 
C44 C45 C46 Ru5 54.2(6) . . . . ? 
C45 C46 C47 C48 0.7(11) . . . . ? 
C52 C46 C47 C48 -175.5(7) . . . . ? 
Ru5 C46 C47 C48 -52.8(6) . . . . ? 
C45 C46 C47 Ru5 53.5(7) . . . . ? 
C52 C46 C47 Ru5 -122.7(7) . . . . ? 
C44 C43 C48 C47 3.5(10) . . . . ? 
C49 C43 C48 C47 -177.8(6) . . . . ? 
Ru5 C43 C48 C47 55.5(6) . . . . ? 
C44 C43 C48 Ru5 -52.0(5) . . . . ? 
C49 C43 C48 Ru5 126.7(7) . . . . ? 
C46 C47 C48 C43 -2.6(10) . . . . ? 
Ru5 C47 C48 C43 -55.8(6) . . . . ? 
C46 C47 C48 Ru5 53.2(6) . . . . ? 
C48 C43 C49 C51 -36.5(10) . . . . ? 
C44 C43 C49 C51 142.2(7) . . . . ? 
Ru5 C43 C49 C51 55.3(10) . . . . ? 
C48 C43 C49 C50 86.7(9) . . . . ? 
C44 C43 C49 C50 -94.6(8) . . . . ? 
Ru5 C43 C49 C50 178.6(7) . . . . ? 
C58 C53 C54 C55 0.9(12) . . . . ? 
C59 C53 C54 C55 -175.1(9) . . . . ? 
Ru6 C53 C54 C55 53.5(6) . . . . ? 
C58 C53 C54 Ru6 -52.6(7) . . . . ? 
C59 C53 C54 Ru6 131.4(10) . . . . ? 
C53 C54 C55 C56 2.1(12) . . . . ? 
Ru6 C54 C55 C56 57.0(7) . . . . ? 
C53 C54 C55 Ru6 -54.9(7) . . . . ? 
C54 C55 C56 C57 -5.5(12) . . . . ? 
Ru6 C55 C56 C57 51.2(7) . . . . ? 
C54 C55 C56 Ru6 -56.7(6) . . . . ? 
C55 C56 C57 C58 5.9(12) . . . . ? 
Ru6 C56 C57 C58 57.8(7) . . . . ? 
C55 C56 C57 Ru6 -51.8(7) . . . . ? 
C56 C57 C58 C53 -3.0(12) . . . . ? 
Ru6 C57 C58 C53 55.0(7) . . . . ? 
C56 C57 C58 Ru6 -58.0(7) . . . . ? 
C54 C53 C58 C57 -0.3(13) . . . . ? 
C59 C53 C58 C57 175.8(9) . . . . ? 
Ru6 C53 C58 C57 -53.7(7) . . . . ? 
C54 C53 C58 Ru6 53.4(7) . . . . ? 
C59 C53 C58 Ru6 -130.5(9) . . . . ? 
C54 C53 C59 C60 -107.8(13) . . . . ? 
C58 C53 C59 C60 76.2(15) . . . . ? 
Ru6 C53 C59 C60 -12.9(16) . . . . ? 
C54 C53 C59 O4 17.8(14) . . . . ? 
C58 C53 C59 O4 -158.1(9) . . . . ? 
Ru6 C53 C59 O4 112.7(10) . . . . ? 
Ru3 O1 Ru1 C4 -175.1(2) . . . . ? 
Ru2 O1 Ru1 C4 98.2(3) . . . . ? 
Ru3 O1 Ru1 C1 -73.5(4) . . . . ? 
Ru2 O1 Ru1 C1 -160.3(3) . . . . ? 
Ru3 O1 Ru1 C3 -138.3(2) . . . . ? 
Ru2 O1 Ru1 C3 134.9(2) . . . . ? 
Ru3 O1 Ru1 C2 -100.3(3) . . . . ? 
Ru2 O1 Ru1 C2 173.0(2) . . . . ? 
Ru3 O1 Ru1 C5 160.5(4) . . . . ? 
Ru2 O1 Ru1 C5 73.8(5) . . . . ? 
Ru3 O1 Ru1 C6 -101(4) . . . . ? 
Ru2 O1 Ru1 C6 173(4) . . . . ? 
Ru2 O1 Ru1 Ru3 -86.76(19) . . . . ? 
Ru3 O1 Ru1 Ru2 86.76(19) . . . . ? 
C5 C4 Ru1 O1 -156.5(4) . . . . ? 
C3 C4 Ru1 O1 71.6(5) . . . . ? 
C10 C4 Ru1 O1 -38.8(10) . . . . ? 
C5 C4 Ru1 C1 64.0(4) . . . . ? 
C3 C4 Ru1 C1 -67.9(5) . . . . ? 
C10 C4 Ru1 C1 -178.3(10) . . . . ? 
C5 C4 Ru1 C3 131.9(7) . . . . ? 
C10 C4 Ru1 C3 -110.4(12) . . . . ? 
C5 C4 Ru1 C2 101.0(5) . . . . ? 
C3 C4 Ru1 C2 -30.9(5) . . . . ? 
C10 C4 Ru1 C2 -141.3(10) . . . . ? 
C3 C4 Ru1 C5 -131.9(7) . . . . ? 
C10 C4 Ru1 C5 117.7(11) . . . . ? 
C5 C4 Ru1 C6 27.9(4) . . . . ? 
C3 C4 Ru1 C6 -104.0(5) . . . . ? 
C10 C4 Ru1 C6 145.6(10) . . . . ? 
C5 C4 Ru1 Ru3 -165.6(4) . . . . ? 
C3 C4 Ru1 Ru3 62.5(7) . . . . ? 
C10 C4 Ru1 Ru3 -47.9(12) . . . . ? 
C5 C4 Ru1 Ru2 -106.9(4) . . . . ? 
C3 C4 Ru1 Ru2 121.2(4) . . . . ? 
C10 C4 Ru1 Ru2 10.8(10) . . . . ? 
C6 C1 Ru1 O1 -176.8(5) . . . . ? 
C2 C1 Ru1 O1 -44.4(6) . . . . ? 
C7 C1 Ru1 O1 67.9(9) . . . . ? 
C6 C1 Ru1 C4 -64.5(6) . . . . ? 
C2 C1 Ru1 C4 67.9(5) . . . . ? 
C7 C1 Ru1 C4 -179.8(9) . . . . ? 
C6 C1 Ru1 C3 -102.9(6) . . . . ? 
C2 C1 Ru1 C3 29.6(5) . . . . ? 
C7 C1 Ru1 C3 141.8(9) . . . . ? 
C6 C1 Ru1 C2 -132.4(8) . . . . ? 
C7 C1 Ru1 C2 112.3(10) . . . . ? 
C6 C1 Ru1 C5 -28.0(5) . . . . ? 
C2 C1 Ru1 C5 104.4(5) . . . . ? 
C7 C1 Ru1 C5 -143.3(9) . . . . ? 
C2 C1 Ru1 C6 132.4(8) . . . . ? 
C7 C1 Ru1 C6 -115.3(10) . . . . ? 
C6 C1 Ru1 Ru3 134.4(5) . . . . ? 
C2 C1 Ru1 Ru3 -93.2(4) . . . . ? 
C7 C1 Ru1 Ru3 19.1(9) . . . . ? 
C6 C1 Ru1 Ru2 79.2(10) . . . . ? 
C2 C1 Ru1 Ru2 -148.4(7) . . . . ? 
C7 C1 Ru1 Ru2 -36.1(14) . . . . ? 
C4 C3 Ru1 O1 -117.2(5) . . . . ? 
C9 C3 Ru1 O1 -0.2(8) . . . . ? 
C2 C3 Ru1 O1 112.4(5) . . . . ? 
C9 C3 Ru1 C4 117.0(9) . . . . ? 
C2 C3 Ru1 C4 -130.5(7) . . . . ? 
C4 C3 Ru1 C1 102.0(5) . . . . ? 
C9 C3 Ru1 C1 -140.9(8) . . . . ? 
C2 C3 Ru1 C1 -28.4(5) . . . . ? 
C4 C3 Ru1 C2 130.5(7) . . . . ? 
C9 C3 Ru1 C2 -112.5(9) . . . . ? 
C4 C3 Ru1 C5 29.2(5) . . . . ? 
C9 C3 Ru1 C5 146.2(8) . . . . ? 
C2 C3 Ru1 C5 -101.3(5) . . . . ? 
C4 C3 Ru1 C6 65.4(5) . . . . ? 
C9 C3 Ru1 C6 -177.5(8) . . . . ? 
C2 C3 Ru1 C6 -65.0(5) . . . . ? 
C4 C3 Ru1 Ru3 -154.2(4) . . . . ? 
C9 C3 Ru1 Ru3 -37.2(8) . . . . ? 
C2 C3 Ru1 Ru3 75.4(5) . . . . ? 
C4 C3 Ru1 Ru2 -78.6(5) . . . . ? 
C9 C3 Ru1 Ru2 38.4(8) . . . . ? 
C2 C3 Ru1 Ru2 151.0(4) . . . . ? 
C1 C2 Ru1 O1 151.1(4) . . . . ? 
C3 C2 Ru1 O1 -75.8(5) . . . . ? 
C8 C2 Ru1 O1 31.0(11) . . . . ? 
C1 C2 Ru1 C4 -102.5(5) . . . . ? 
C3 C2 Ru1 C4 30.6(5) . . . . ? 
C8 C2 Ru1 C4 137.4(11) . . . . ? 
C3 C2 Ru1 C1 133.1(7) . . . . ? 
C8 C2 Ru1 C1 -120.1(12) . . . . ? 
C1 C2 Ru1 C3 -133.1(7) . . . . ? 
C8 C2 Ru1 C3 106.8(11) . . . . ? 
C1 C2 Ru1 C5 -65.0(5) . . . . ? 
C3 C2 Ru1 C5 68.0(5) . . . . ? 
C8 C2 Ru1 C5 174.8(11) . . . . ? 
C1 C2 Ru1 C6 -28.9(5) . . . . ? 
C3 C2 Ru1 C6 104.2(5) . . . . ? 
C8 C2 Ru1 C6 -149.0(11) . . . . ? 
C1 C2 Ru1 Ru3 102.1(4) . . . . ? 
C3 C2 Ru1 Ru3 -124.8(4) . . . . ? 
C8 C2 Ru1 Ru3 -18.0(11) . . . . ? 
C1 C2 Ru1 Ru2 162.7(4) . . . . ? 
C3 C2 Ru1 Ru2 -64.2(7) . . . . ? 
C8 C2 Ru1 Ru2 42.6(13) . . . . ? 
C6 C5 Ru1 O1 173.1(4) . . . . ? 
C4 C5 Ru1 O1 39.1(6) . . . . ? 
C11 C5 Ru1 O1 -74.9(10) . . . . ? 
C6 C5 Ru1 C4 133.9(7) . . . . ? 
C11 C5 Ru1 C4 -114.0(10) . . . . ? 
C6 C5 Ru1 C1 28.1(5) . . . . ? 
C4 C5 Ru1 C1 -105.8(5) . . . . ? 
C11 C5 Ru1 C1 140.1(10) . . . . ? 
C6 C5 Ru1 C3 103.9(5) . . . . ? 
C4 C5 Ru1 C3 -30.0(4) . . . . ? 
C11 C5 Ru1 C3 -144.0(9) . . . . ? 
C6 C5 Ru1 C2 64.9(5) . . . . ? 
C4 C5 Ru1 C2 -69.0(5) . . . . ? 
C11 C5 Ru1 C2 177.0(9) . . . . ? 
C4 C5 Ru1 C6 -133.9(7) . . . . ? 
C11 C5 Ru1 C6 112.1(11) . . . . ? 
C6 C5 Ru1 Ru3 -66.4(9) . . . . ? 
C4 C5 Ru1 Ru3 159.6(6) . . . . ? 
C11 C5 Ru1 Ru3 45.6(13) . . . . ? 
C6 C5 Ru1 Ru2 -136.4(4) . . . . ? 
C4 C5 Ru1 Ru2 89.6(4) . . . . ? 
C11 C5 Ru1 Ru2 -24.4(10) . . . . ? 
C1 C6 Ru1 O1 29(4) . . . . ? 
C5 C6 Ru1 O1 -105(4) . . . . ? 
C12 C6 Ru1 O1 140(3) . . . . ? 
C1 C6 Ru1 C4 105.6(6) . . . . ? 
C5 C6 Ru1 C4 -28.4(5) . . . . ? 
C12 C6 Ru1 C4 -143.9(9) . . . . ? 
C5 C6 Ru1 C1 -134.0(8) . . . . ? 
C12 C6 Ru1 C1 110.5(11) . . . . ? 
C1 C6 Ru1 C3 67.6(5) . . . . ? 
C5 C6 Ru1 C3 -66.4(5) . . . . ? 
C12 C6 Ru1 C3 178.0(9) . . . . ? 
C1 C6 Ru1 C2 29.2(5) . . . . ? 
C5 C6 Ru1 C2 -104.8(6) . . . . ? 
C12 C6 Ru1 C2 139.7(10) . . . . ? 
C1 C6 Ru1 C5 134.0(8) . . . . ? 
C12 C6 Ru1 C5 -115.6(10) . . . . ? 
C1 C6 Ru1 Ru3 -67.0(6) . . . . ? 
C5 C6 Ru1 Ru3 159.0(4) . . . . ? 
C12 C6 Ru1 Ru3 43.4(10) . . . . ? 
C1 C6 Ru1 Ru2 -158.4(4) . . . . ? 
C5 C6 Ru1 Ru2 67.6(6) . . . . ? 
C12 C6 Ru1 Ru2 -47.9(10) . . . . ? 
Ru3 O1 Ru2 C14 -166.6(3) . . . . ? 
Ru1 O1 Ru2 C14 -79.2(4) . . . . ? 
Ru3 O1 Ru2 C15 164.7(3) . . . . ? 
Ru1 O1 Ru2 C15 -107.9(3) . . . . ? 
Ru3 O1 Ru2 C18 67.9(5) . . . . ? 
Ru1 O1 Ru2 C18 155.3(4) . . . . ? 
Ru3 O1 Ru2 C16 128.3(3) . . . . ? 
Ru1 O1 Ru2 C16 -144.3(3) . . . . ? 
Ru3 O1 Ru2 C17 93.1(3) . . . . ? 
Ru1 O1 Ru2 C17 -179.5(3) . . . . ? 
Ru3 O1 Ru2 C13 -166(3) . . . . ? 
Ru1 O1 Ru2 C13 -79(3) . . . . ? 
Ru1 O1 Ru2 Ru3 87.42(19) . . . . ? 
Ru3 O1 Ru2 Ru1 -87.42(19) . . . . ? 
C15 C14 Ru2 O1 -48.6(7) . . . . ? 
C13 C14 Ru2 O1 179.9(4) . . . . ? 
C13 C14 Ru2 C15 -131.5(7) . . . . ? 
C15 C14 Ru2 C18 101.4(6) . . . . ? 
C13 C14 Ru2 C18 -30.1(4) . . . . ? 
C15 C14 Ru2 C16 27.1(5) . . . . ? 
C13 C14 Ru2 C16 -104.4(5) . . . . ? 
C15 C14 Ru2 C17 64.8(5) . . . . ? 
C13 C14 Ru2 C17 -66.6(5) . . . . ? 
C15 C14 Ru2 C13 131.5(7) . . . . ? 
C15 C14 Ru2 Ru3 -154.9(11) . . . . ? 
C13 C14 Ru2 Ru3 73.7(14) . . . . ? 
C15 C14 Ru2 Ru1 -99.8(5) . . . . ? 
C13 C14 Ru2 Ru1 128.8(4) . . . . ? 
C16 C15 Ru2 O1 -76.9(5) . . . . ? 
C14 C15 Ru2 O1 147.6(5) . . . . ? 
C16 C15 Ru2 C14 135.6(8) . . . . ? 
C16 C15 Ru2 C18 68.0(5) . . . . ? 
C14 C15 Ru2 C18 -67.6(5) . . . . ? 
C14 C15 Ru2 C16 -135.6(8) . . . . ? 
C16 C15 Ru2 C17 31.6(5) . . . . ? 
C14 C15 Ru2 C17 -104.0(5) . . . . ? 
C16 C15 Ru2 C13 105.6(6) . . . . ? 
C14 C15 Ru2 C13 -30.0(5) . . . . ? 
C16 C15 Ru2 Ru3 -53.3(8) . . . . ? 
C14 C15 Ru2 Ru3 171.1(4) . . . . ? 
C16 C15 Ru2 Ru1 -126.2(5) . . . . ? 
C14 C15 Ru2 Ru1 98.3(5) . . . . ? 
C17 C18 Ru2 O1 40.6(7) . . . . ? 
C13 C18 Ru2 O1 173.8(4) . . . . ? 
C17 C18 Ru2 C14 -102.6(5) . . . . ? 
C13 C18 Ru2 C14 30.6(5) . . . . ? 
C17 C18 Ru2 C15 -65.1(5) . . . . ? 
C13 C18 Ru2 C15 68.1(5) . . . . ? 
C17 C18 Ru2 C16 -27.9(4) . . . . ? 
C13 C18 Ru2 C16 105.2(5) . . . . ? 
C13 C18 Ru2 C17 133.2(7) . . . . ? 
C17 C18 Ru2 C13 -133.2(7) . . . . ? 
C17 C18 Ru2 Ru3 88.2(4) . . . . ? 
C13 C18 Ru2 Ru3 -138.7(4) . . . . ? 
C17 C18 Ru2 Ru1 156.4(5) . . . . ? 
C13 C18 Ru2 Ru1 -70.4(8) . . . . ? 
C15 C16 Ru2 O1 111.1(5) . . . . ? 
C17 C16 Ru2 O1 -120.5(4) . . . . ? 
C22 C16 Ru2 O1 -3.8(9) . . . . ? 
C15 C16 Ru2 C14 -27.3(5) . . . . ? 
C17 C16 Ru2 C14 101.1(4) . . . . ? 
C22 C16 Ru2 C14 -142.2(10) . . . . ? 
C17 C16 Ru2 C15 128.4(6) . . . . ? 
C22 C16 Ru2 C15 -114.9(11) . . . . ? 
C15 C16 Ru2 C18 -101.2(5) . . . . ? 
C17 C16 Ru2 C18 27.3(4) . . . . ? 
C22 C16 Ru2 C18 143.9(10) . . . . ? 
C15 C16 Ru2 C17 -128.4(6) . . . . ? 
C22 C16 Ru2 C17 116.7(10) . . . . ? 
C15 C16 Ru2 C13 -64.6(5) . . . . ? 
C17 C16 Ru2 C13 63.8(4) . . . . ? 
C22 C16 Ru2 C13 -179.5(9) . . . . ? 
C15 C16 Ru2 Ru3 153.1(4) . . . . ? 
C17 C16 Ru2 Ru3 -78.5(4) . . . . ? 
C22 C16 Ru2 Ru3 38.2(10) . . . . ? 
C15 C16 Ru2 Ru1 76.9(5) . . . . ? 
C17 C16 Ru2 Ru1 -154.6(3) . . . . ? 
C22 C16 Ru2 Ru1 -38.0(10) . . . . ? 
C18 C17 Ru2 O1 -156.2(4) . . . . ? 
C16 C17 Ru2 O1 69.0(4) . . . . ? 
C18 C17 Ru2 C14 66.8(5) . . . . ? 
C16 C17 Ru2 C14 -68.1(4) . . . . ? 
C18 C17 Ru2 C15 103.8(5) . . . . ? 
C16 C17 Ru2 C15 -31.1(4) . . . . ? 
C16 C17 Ru2 C18 -134.9(6) . . . . ? 
C18 C17 Ru2 C16 134.9(6) . . . . ? 
C18 C17 Ru2 C13 28.8(4) . . . . ? 
C16 C17 Ru2 C13 -106.0(5) . . . . ? 
C18 C17 Ru2 Ru3 -106.5(4) . . . . ? 
C16 C17 Ru2 Ru3 118.7(4) . . . . ? 
C18 C17 Ru2 Ru1 -157.3(5) . . . . ? 
C16 C17 Ru2 Ru1 67.9(8) . . . . ? 
C18 C13 Ru2 O1 -131(3) . . . . ? 
C14 C13 Ru2 O1 0(3) . . . . ? 
C19 C13 Ru2 O1 116(3) . . . . ? 
C18 C13 Ru2 C14 -130.4(7) . . . . ? 
C19 C13 Ru2 C14 116.1(9) . . . . ? 
C18 C13 Ru2 C15 -101.0(5) . . . . ? 
C14 C13 Ru2 C15 29.5(5) . . . . ? 
C19 C13 Ru2 C15 145.6(8) . . . . ? 
C14 C13 Ru2 C18 130.4(7) . . . . ? 
C19 C13 Ru2 C18 -113.4(9) . . . . ? 
C18 C13 Ru2 C16 -64.9(5) . . . . ? 
C14 C13 Ru2 C16 65.6(5) . . . . ? 
C19 C13 Ru2 C16 -178.3(8) . . . . ? 
C18 C13 Ru2 C17 -28.3(5) . . . . ? 
C14 C13 Ru2 C17 102.2(5) . . . . ? 
C19 C13 Ru2 C17 -141.7(8) . . . . ? 
C18 C13 Ru2 Ru3 64.1(5) . . . . ? 
C14 C13 Ru2 Ru3 -165.5(3) . . . . ? 
C19 C13 Ru2 Ru3 -49.4(8) . . . . ? 
C18 C13 Ru2 Ru1 154.6(4) . . . . ? 
C14 C13 Ru2 Ru1 -75.0(5) . . . . ? 
C19 C13 Ru2 Ru1 41.1(9) . . . . ? 
C4 Ru1 Ru2 O1 -100.3(3) . . . . ? 
C1 Ru1 Ru2 O1 118.3(8) . . . . ? 
C3 Ru1 Ru2 O1 -59.3(3) . . . . ? 
C2 Ru1 Ru2 O1 -15.2(5) . . . . ? 
C5 Ru1 Ru2 O1 -140.9(3) . . . . ? 
C6 Ru1 Ru2 O1 -179.2(4) . . . . ? 
Ru3 Ru1 Ru2 O1 56.9(2) . . . . ? 
O1 Ru1 Ru2 C14 132.7(3) . . . . ? 
C4 Ru1 Ru2 C14 32.4(3) . . . . ? 
C1 Ru1 Ru2 C14 -109.0(9) . . . . ? 
C3 Ru1 Ru2 C14 73.4(3) . . . . ? 
C2 Ru1 Ru2 C14 117.4(5) . . . . ? 
C5 Ru1 Ru2 C14 -8.2(4) . . . . ? 
C6 Ru1 Ru2 C14 -46.5(4) . . . . ? 
Ru3 Ru1 Ru2 C14 -170.5(2) . . . . ? 
O1 Ru1 Ru2 C15 91.2(3) . . . . ? 
C4 Ru1 Ru2 C15 -9.1(3) . . . . ? 
C1 Ru1 Ru2 C15 -150.5(8) . . . . ? 
C3 Ru1 Ru2 C15 31.9(3) . . . . ? 
C2 Ru1 Ru2 C15 75.9(5) . . . . ? 
C5 Ru1 Ru2 C15 -49.7(3) . . . . ? 
C6 Ru1 Ru2 C15 -88.0(4) . . . . ? 
Ru3 Ru1 Ru2 C15 148.0(2) . . . . ? 
O1 Ru1 Ru2 C18 -134.7(6) . . . . ? 
C4 Ru1 Ru2 C18 125.0(6) . . . . ? 
C1 Ru1 Ru2 C18 -16.4(10) . . . . ? 
C3 Ru1 Ru2 C18 165.9(6) . . . . ? 
C2 Ru1 Ru2 C18 -150.0(7) . . . . ? 
C5 Ru1 Ru2 C18 84.4(6) . . . . ? 
C6 Ru1 Ru2 C18 46.0(7) . . . . ? 
Ru3 Ru1 Ru2 C18 -77.9(6) . . . . ? 
O1 Ru1 Ru2 C16 50.6(3) . . . . ? 
C4 Ru1 Ru2 C16 -49.7(4) . . . . ? 
C1 Ru1 Ru2 C16 168.9(9) . . . . ? 
C3 Ru1 Ru2 C16 -8.7(4) . . . . ? 
C2 Ru1 Ru2 C16 35.4(6) . . . . ? 
C5 Ru1 Ru2 C16 -90.3(4) . . . . ? 
C6 Ru1 Ru2 C16 -128.6(4) . . . . ? 
Ru3 Ru1 Ru2 C16 107.5(3) . . . . ? 
O1 Ru1 Ru2 C17 1.4(7) . . . . ? 
C4 Ru1 Ru2 C17 -98.8(7) . . . . ? 
C1 Ru1 Ru2 C17 119.8(11) . . . . ? 
C3 Ru1 Ru2 C17 -57.9(7) . . . . ? 
C2 Ru1 Ru2 C17 -13.8(8) . . . . ? 
C5 Ru1 Ru2 C17 -139.4(7) . . . . ? 
C6 Ru1 Ru2 C17 -177.8(8) . . . . ? 
Ru3 Ru1 Ru2 C17 58.3(7) . . . . ? 
O1 Ru1 Ru2 C13 173.8(4) . . . . ? 
C4 Ru1 Ru2 C13 73.5(4) . . . . ? 
C1 Ru1 Ru2 C13 -67.9(9) . . . . ? 
C3 Ru1 Ru2 C13 114.5(4) . . . . ? 
C2 Ru1 Ru2 C13 158.5(6) . . . . ? 
C5 Ru1 Ru2 C13 32.9(4) . . . . ? 
C6 Ru1 Ru2 C13 -5.4(5) . . . . ? 
Ru3 Ru1 Ru2 C13 -129.4(3) . . . . ? 
O1 Ru1 Ru2 Ru3 -56.9(2) . . . . ? 
C4 Ru1 Ru2 Ru3 -157.1(3) . . . . ? 
C1 Ru1 Ru2 Ru3 61.5(8) . . . . ? 
C3 Ru1 Ru2 Ru3 -116.2(2) . . . . ? 
C2 Ru1 Ru2 Ru3 -72.1(5) . . . . ? 
C5 Ru1 Ru2 Ru3 162.3(3) . . . . ? 
C6 Ru1 Ru2 Ru3 123.9(3) . . . . ? 
Ru1 O1 Ru3 C23 147.2(3) . . . . ? 
Ru2 O1 Ru3 C23 -125.0(3) . . . . ? 
Ru1 O1 Ru3 C25 -156.8(4) . . . . ? 
Ru2 O1 Ru3 C25 -69.1(5) . . . . ? 
Ru1 O1 Ru3 C27 81.6(4) . . . . ? 
Ru2 O1 Ru3 C27 169.4(3) . . . . ? 
Ru1 O1 Ru3 C24 -178.9(2) . . . . ? 
Ru2 O1 Ru3 C24 -91.1(3) . . . . ? 
Ru1 O1 Ru3 C28 109.2(3) . . . . ? 
Ru2 O1 Ru3 C28 -163.1(3) . . . . ? 
Ru1 O1 Ru3 C26 90(2) . . . . ? 
Ru2 O1 Ru3 C26 177(2) . . . . ? 
Ru1 O1 Ru3 Ru2 -87.72(17) . . . . ? 
Ru2 O1 Ru3 Ru1 87.72(17) . . . . ? 
C24 C23 Ru3 O1 122.0(5) . . . . ? 
C28 C23 Ru3 O1 -107.7(5) . . . . ? 
C29 C23 Ru3 O1 9.0(7) . . . . ? 
C24 C23 Ru3 C25 -29.2(5) . . . . ? 
C28 C23 Ru3 C25 101.1(6) . . . . ? 
C29 C23 Ru3 C25 -142.2(7) . . . . ? 
C24 C23 Ru3 C27 -102.8(6) . . . . ? 
C28 C23 Ru3 C27 27.4(5) . . . . ? 
C29 C23 Ru3 C27 144.2(8) . . . . ? 
C28 C23 Ru3 C24 130.2(8) . . . . ? 
C29 C23 Ru3 C24 -113.0(8) . . . . ? 
C24 C23 Ru3 C28 -130.2(8) . . . . ? 
C29 C23 Ru3 C28 116.8(9) . . . . ? 
C24 C23 Ru3 C26 -65.1(5) . . . . ? 
C28 C23 Ru3 C26 65.2(6) . . . . ? 
C29 C23 Ru3 C26 -178.1(7) . . . . ? 
C24 C23 Ru3 Ru2 79.2(5) . . . . ? 
C28 C23 Ru3 Ru2 -150.6(4) . . . . ? 
C29 C23 Ru3 Ru2 -33.9(8) . . . . ? 
C24 C23 Ru3 Ru1 154.0(4) . . . . ? 
C28 C23 Ru3 Ru1 -75.8(6) . . . . ? 
C29 C23 Ru3 Ru1 41.0(8) . . . . ? 
C26 C25 Ru3 O1 -167.2(4) . . . . ? 
C24 C25 Ru3 O1 -34.3(7) . . . . ? 
C26 C25 Ru3 C23 -104.1(5) . . . . ? 
C24 C25 Ru3 C23 28.8(4) . . . . ? 
C26 C25 Ru3 C27 -28.9(5) . . . . ? 
C24 C25 Ru3 C27 104.0(5) . . . . ? 
C26 C25 Ru3 C24 -132.9(7) . . . . ? 
C26 C25 Ru3 C28 -65.5(5) . . . . ? 
C24 C25 Ru3 C28 67.4(5) . . . . ? 
C24 C25 Ru3 C26 132.9(7) . . . . ? 
C26 C25 Ru3 Ru2 143.6(4) . . . . ? 
C24 C25 Ru3 Ru2 -83.5(4) . . . . ? 
C26 C25 Ru3 Ru1 69.0(8) . . . . ? 
C24 C25 Ru3 Ru1 -158.1(5) . . . . ? 
C28 C27 Ru3 O1 47.9(7) . . . . ? 
C26 C27 Ru3 O1 178.1(5) . . . . ? 
C28 C27 Ru3 C23 -28.6(6) . . . . ? 
C26 C27 Ru3 C23 101.6(6) . . . . ? 
C28 C27 Ru3 C25 -102.4(6) . . . . ? 
C26 C27 Ru3 C25 27.8(5) . . . . ? 
C28 C27 Ru3 C24 -65.3(6) . . . . ? 
C26 C27 Ru3 C24 64.9(6) . . . . ? 
C26 C27 Ru3 C28 130.2(9) . . . . ? 
C28 C27 Ru3 C26 -130.2(9) . . . . ? 
C28 C27 Ru3 Ru2 138.5(16) . . . . ? 
C26 C27 Ru3 Ru2 -91.3(19) . . . . ? 
C28 C27 Ru3 Ru1 99.4(6) . . . . ? 
C26 C27 Ru3 Ru1 -130.4(5) . . . . ? 
C23 C24 Ru3 O1 -66.7(5) . . . . ? 
C25 C24 Ru3 O1 160.7(4) . . . . ? 
C25 C24 Ru3 C23 -132.6(7) . . . . ? 
C23 C24 Ru3 C25 132.6(7) . . . . ? 
C23 C24 Ru3 C27 67.1(5) . . . . ? 
C25 C24 Ru3 C27 -65.4(5) . . . . ? 
C23 C24 Ru3 C28 31.0(5) . . . . ? 
C25 C24 Ru3 C28 -101.6(5) . . . . ? 
C23 C24 Ru3 C26 104.3(5) . . . . ? 
C25 C24 Ru3 C26 -28.2(5) . . . . ? 
C23 C24 Ru3 Ru2 -116.1(4) . . . . ? 
C25 C24 Ru3 Ru2 111.3(4) . . . . ? 
C23 C24 Ru3 Ru1 -69.1(8) . . . . ? 
C25 C24 Ru3 Ru1 158.3(5) . . . . ? 
C27 C28 Ru3 O1 -146.3(5) . . . . ? 
C23 C28 Ru3 O1 79.4(5) . . . . ? 
C27 C28 Ru3 C23 134.4(8) . . . . ? 
C27 C28 Ru3 C25 66.8(6) . . . . ? 
C23 C28 Ru3 C25 -67.5(5) . . . . ? 
C23 C28 Ru3 C27 -134.4(8) . . . . ? 
C27 C28 Ru3 C24 104.4(6) . . . . ? 
C23 C28 Ru3 C24 -29.9(5) . . . . ? 
C27 C28 Ru3 C26 30.7(6) . . . . ? 
C23 C28 Ru3 C26 -103.6(6) . . . . ? 
C27 C28 Ru3 Ru2 -170.2(4) . . . . ? 
C23 C28 Ru3 Ru2 55.4(8) . . . . ? 
C27 C28 Ru3 Ru1 -97.6(5) . . . . ? 
C23 C28 Ru3 Ru1 128.0(5) . . . . ? 
C25 C26 Ru3 O1 124(2) . . . . ? 
C27 C26 Ru3 O1 -9(2) . . . . ? 
C25 C26 Ru3 C23 65.6(5) . . . . ? 
C27 C26 Ru3 C23 -67.9(6) . . . . ? 
C27 C26 Ru3 C25 -133.5(8) . . . . ? 
C25 C26 Ru3 C27 133.5(8) . . . . ? 
C25 C26 Ru3 C24 29.1(5) . . . . ? 
C27 C26 Ru3 C24 -104.4(6) . . . . ? 
C25 C26 Ru3 C28 103.6(6) . . . . ? 
C27 C26 Ru3 C28 -29.9(5) . . . . ? 
C25 C26 Ru3 Ru2 -58.9(6) . . . . ? 
C27 C26 Ru3 Ru2 167.5(4) . . . . ? 
C25 C26 Ru3 Ru1 -154.0(4) . . . . ? 
C27 C26 Ru3 Ru1 72.5(6) . . . . ? 
C14 Ru2 Ru3 O1 115.8(13) . . . . ? 
C15 Ru2 Ru3 O1 -31.6(6) . . . . ? 
C18 Ru2 Ru3 O1 -144.7(3) . . . . ? 
C16 Ru2 Ru3 O1 -66.3(4) . . . . ? 
C17 Ru2 Ru3 O1 -105.5(3) . . . . ? 
C13 Ru2 Ru3 O1 178.3(4) . . . . ? 
Ru1 Ru2 Ru3 O1 56.3(2) . . . . ? 
O1 Ru2 Ru3 C23 68.4(3) . . . . ? 
C14 Ru2 Ru3 C23 -175.8(13) . . . . ? 
C15 Ru2 Ru3 C23 36.8(6) . . . . ? 
C18 Ru2 Ru3 C23 -76.3(4) . . . . ? 
C16 Ru2 Ru3 C23 2.1(4) . . . . ? 
C17 Ru2 Ru3 C23 -37.2(4) . . . . ? 
C13 Ru2 Ru3 C23 -113.3(4) . . . . ? 
Ru1 Ru2 Ru3 C23 124.7(3) . . . . ? 
O1 Ru2 Ru3 C25 146.0(3) . . . . ? 
C14 Ru2 Ru3 C25 -98.2(13) . . . . ? 
C15 Ru2 Ru3 C25 114.5(6) . . . . ? 
C18 Ru2 Ru3 C25 1.4(3) . . . . ? 
C16 Ru2 Ru3 C25 79.7(4) . . . . ? 
C17 Ru2 Ru3 C25 40.5(3) . . . . ? 
C13 Ru2 Ru3 C25 -35.6(4) . . . . ? 
Ru1 Ru2 Ru3 C25 -157.6(3) . . . . ? 
O1 Ru2 Ru3 C27 -97.9(18) . . . . ? 
C14 Ru2 Ru3 C27 18(2) . . . . ? 
C15 Ru2 Ru3 C27 -129.5(19) . . . . ? 
C18 Ru2 Ru3 C27 117.4(18) . . . . ? 
C16 Ru2 Ru3 C27 -164.3(18) . . . . ? 
C17 Ru2 Ru3 C27 156.5(18) . . . . ? 
C13 Ru2 Ru3 C27 80.4(18) . . . . ? 
Ru1 Ru2 Ru3 C27 -41.6(18) . . . . ? 
O1 Ru2 Ru3 C24 106.7(3) . . . . ? 
C14 Ru2 Ru3 C24 -137.5(13) . . . . ? 
C15 Ru2 Ru3 C24 75.1(6) . . . . ? 
C18 Ru2 Ru3 C24 -38.0(3) . . . . ? 
C16 Ru2 Ru3 C24 40.3(4) . . . . ? 
C17 Ru2 Ru3 C24 1.1(3) . . . . ? 
C13 Ru2 Ru3 C24 -75.0(4) . . . . ? 
Ru1 Ru2 Ru3 C24 163.0(2) . . . . ? 
O1 Ru2 Ru3 C28 32.5(6) . . . . ? 
C14 Ru2 Ru3 C28 148.3(14) . . . . ? 
C15 Ru2 Ru3 C28 0.9(8) . . . . ? 
C18 Ru2 Ru3 C28 -112.2(6) . . . . ? 
C16 Ru2 Ru3 C28 -33.9(6) . . . . ? 
C17 Ru2 Ru3 C28 -73.1(6) . . . . ? 
C13 Ru2 Ru3 C28 -149.2(6) . . . . ? 
Ru1 Ru2 Ru3 C28 88.8(5) . . . . ? 
O1 Ru2 Ru3 C26 -179.4(5) . . . . ? 
C14 Ru2 Ru3 C26 -63.6(14) . . . . ? 
C15 Ru2 Ru3 C26 149.0(7) . . . . ? 
C18 Ru2 Ru3 C26 35.9(5) . . . . ? 
C16 Ru2 Ru3 C26 114.3(5) . . . . ? 
C17 Ru2 Ru3 C26 75.1(5) . . . . ? 
C13 Ru2 Ru3 C26 -1.1(5) . . . . ? 
Ru1 Ru2 Ru3 C26 -123.1(4) . . . . ? 
O1 Ru2 Ru3 Ru1 -56.3(2) . . . . ? 
C14 Ru2 Ru3 Ru1 59.5(13) . . . . ? 
C15 Ru2 Ru3 Ru1 -87.9(6) . . . . ? 
C18 Ru2 Ru3 Ru1 159.0(2) . . . . ? 
C16 Ru2 Ru3 Ru1 -122.7(3) . . . . ? 
C17 Ru2 Ru3 Ru1 -161.9(2) . . . . ? 
C13 Ru2 Ru3 Ru1 122.0(3) . . . . ? 
C4 Ru1 Ru3 O1 11.9(5) . . . . ? 
C1 Ru1 Ru3 O1 137.0(3) . . . . ? 
C3 Ru1 Ru3 O1 56.1(3) . . . . ? 
C2 Ru1 Ru3 O1 96.7(3) . . . . ? 
C5 Ru1 Ru3 O1 -135.3(7) . . . . ? 
C6 Ru1 Ru3 O1 174.2(3) . . . . ? 
Ru2 Ru1 Ru3 O1 -56.80(16) . . . . ? 
O1 Ru1 Ru3 C23 -46.6(3) . . . . ? 
C4 Ru1 Ru3 C23 -34.8(6) . . . . ? 
C1 Ru1 Ru3 C23 90.4(4) . . . . ? 
C3 Ru1 Ru3 C23 9.4(4) . . . . ? 
C2 Ru1 Ru3 C23 50.0(4) . . . . ? 
C5 Ru1 Ru3 C23 178.1(8) . . . . ? 
C6 Ru1 Ru3 C23 127.5(4) . . . . ? 
Ru2 Ru1 Ru3 C23 -103.5(3) . . . . ? 
O1 Ru1 Ru3 C25 141.9(6) . . . . ? 
C4 Ru1 Ru3 C25 153.8(8) . . . . ? 
C1 Ru1 Ru3 C25 -81.0(7) . . . . ? 
C3 Ru1 Ru3 C25 -162.0(7) . . . . ? 
C2 Ru1 Ru3 C25 -121.4(7) . . . . ? 
C5 Ru1 Ru3 C25 6.7(10) . . . . ? 
C6 Ru1 Ru3 C25 -43.9(7) . . . . ? 
Ru2 Ru1 Ru3 C25 85.1(6) . . . . ? 
O1 Ru1 Ru3 C27 -128.8(3) . . . . ? 
C4 Ru1 Ru3 C27 -116.9(6) . . . . ? 
C1 Ru1 Ru3 C27 8.3(3) . . . . ? 
C3 Ru1 Ru3 C27 -72.7(4) . . . . ? 
C2 Ru1 Ru3 C27 -32.1(3) . . . . ? 
C5 Ru1 Ru3 C27 95.9(8) . . . . ? 
C6 Ru1 Ru3 C27 45.4(4) . . . . ? 
Ru2 Ru1 Ru3 C27 174.4(3) . . . . ? 
O1 Ru1 Ru3 C24 3.0(6) . . . . ? 
C4 Ru1 Ru3 C24 14.9(8) . . . . ? 
C1 Ru1 Ru3 C24 140.1(6) . . . . ? 
C3 Ru1 Ru3 C24 59.1(6) . . . . ? 
C2 Ru1 Ru3 C24 99.7(6) . . . . ? 
C5 Ru1 Ru3 C24 -132.2(9) . . . . ? 
C6 Ru1 Ru3 C24 177.2(6) . . . . ? 
Ru2 Ru1 Ru3 C24 -53.8(6) . . . . ? 
O1 Ru1 Ru3 C28 -88.2(3) . . . . ? 
C4 Ru1 Ru3 C28 -76.4(6) . . . . ? 
C1 Ru1 Ru3 C28 48.8(4) . . . . ? 
C3 Ru1 Ru3 C28 -32.2(4) . . . . ? 
C2 Ru1 Ru3 C28 8.4(4) . . . . ? 
C5 Ru1 Ru3 C28 136.5(8) . . . . ? 
C6 Ru1 Ru3 C28 85.9(4) . . . . ? 
Ru2 Ru1 Ru3 C28 -145.0(3) . . . . ? 
O1 Ru1 Ru3 C26 -168.6(4) . . . . ? 
C4 Ru1 Ru3 C26 -156.8(6) . . . . ? 
C1 Ru1 Ru3 C26 -31.6(4) . . . . ? 
C3 Ru1 Ru3 C26 -112.6(4) . . . . ? 
C2 Ru1 Ru3 C26 -72.0(4) . . . . ? 
C5 Ru1 Ru3 C26 56.1(8) . . . . ? 
C6 Ru1 Ru3 C26 5.5(4) . . . . ? 
Ru2 Ru1 Ru3 C26 134.6(3) . . . . ? 
O1 Ru1 Ru3 Ru2 56.80(16) . . . . ? 
C4 Ru1 Ru3 Ru2 68.7(5) . . . . ? 
C1 Ru1 Ru3 Ru2 -166.2(2) . . . . ? 
C3 Ru1 Ru3 Ru2 112.9(3) . . . . ? 
C2 Ru1 Ru3 Ru2 153.5(2) . . . . ? 
C5 Ru1 Ru3 Ru2 -78.5(7) . . . . ? 
C6 Ru1 Ru3 Ru2 -129.0(3) . . . . ? 
Ru5 O3 Ru4 C32 -74.0(4) . . . . ? 
Ru6 O3 Ru4 C32 -161.1(4) . . . . ? 
Ru5 O3 Ru4 C34 -136.4(3) . . . . ? 
Ru6 O3 Ru4 C34 136.5(2) . . . . ? 
Ru5 O3 Ru4 C36 162.0(4) . . . . ? 
Ru6 O3 Ru4 C36 74.9(4) . . . . ? 
Ru5 O3 Ru4 C33 -100.5(3) . . . . ? 
Ru6 O3 Ru4 C33 172.4(2) . . . . ? 
Ru5 O3 Ru4 C35 -171.9(3) . . . . ? 
Ru6 O3 Ru4 C35 101.0(3) . . . . ? 
Ru5 O3 Ru4 C31 -169(3) . . . . ? 
Ru6 O3 Ru4 C31 104(3) . . . . ? 
Ru5 O3 Ru4 Ru6 87.10(18) . . . . ? 
Ru6 O3 Ru4 Ru5 -87.10(18) . . . . ? 
C31 C32 Ru4 O3 -172.0(5) . . . . ? 
C33 C32 Ru4 O3 -42.3(6) . . . . ? 
C38 C32 Ru4 O3 73.3(11) . . . . ? 
C31 C32 Ru4 C34 -100.9(6) . . . . ? 
C33 C32 Ru4 C34 28.8(4) . . . . ? 
C38 C32 Ru4 C34 144.4(10) . . . . ? 
C31 C32 Ru4 C36 -28.3(5) . . . . ? 
C33 C32 Ru4 C36 101.5(5) . . . . ? 
C38 C32 Ru4 C36 -142.9(10) . . . . ? 
C31 C32 Ru4 C33 -129.7(7) . . . . ? 
C38 C32 Ru4 C33 115.6(11) . . . . ? 
C31 C32 Ru4 C35 -64.6(6) . . . . ? 
C33 C32 Ru4 C35 65.1(5) . . . . ? 
C38 C32 Ru4 C35 -179.3(10) . . . . ? 
C33 C32 Ru4 C31 129.7(7) . . . . ? 
C38 C32 Ru4 C31 -114.7(12) . . . . ? 
C31 C32 Ru4 Ru6 66.7(9) . . . . ? 
C33 C32 Ru4 Ru6 -163.6(6) . . . . ? 
C38 C32 Ru4 Ru6 -48.0(14) . . . . ? 
C31 C32 Ru4 Ru5 137.4(5) . . . . ? 
C33 C32 Ru4 Ru5 -92.9(4) . . . . ? 
C38 C32 Ru4 Ru5 22.7(10) . . . . ? 
C35 C34 Ru4 O3 -112.4(5) . . . . ? 
C33 C34 Ru4 O3 116.0(5) . . . . ? 
C40 C34 Ru4 O3 5.0(10) . . . . ? 
C35 C34 Ru4 C32 102.3(6) . . . . ? 
C33 C34 Ru4 C32 -29.3(5) . . . . ? 
C40 C34 Ru4 C32 -140.3(10) . . . . ? 
C35 C34 Ru4 C36 28.4(5) . . . . ? 
C33 C34 Ru4 C36 -103.2(6) . . . . ? 
C40 C34 Ru4 C36 145.8(10) . . . . ? 
C35 C34 Ru4 C33 131.6(8) . . . . ? 
C40 C34 Ru4 C33 -111.0(11) . . . . ? 
C33 C34 Ru4 C35 -131.6(8) . . . . ? 
C40 C34 Ru4 C35 117.4(12) . . . . ? 
C35 C34 Ru4 C31 64.9(6) . . . . ? 
C33 C34 Ru4 C31 -66.7(5) . . . . ? 
C40 C34 Ru4 C31 -177.7(10) . . . . ? 
C35 C34 Ru4 Ru6 -73.4(6) . . . . ? 
C33 C34 Ru4 Ru6 154.9(4) . . . . ? 
C40 C34 Ru4 Ru6 43.9(10) . . . . ? 
C35 C34 Ru4 Ru5 -151.1(5) . . . . ? 
C33 C34 Ru4 Ru5 77.3(6) . . . . ? 
C40 C34 Ru4 Ru5 -33.7(10) . . . . ? 
C35 C36 Ru4 O3 44.1(7) . . . . ? 
C31 C36 Ru4 O3 176.1(5) . . . . ? 
C42 C36 Ru4 O3 -69.5(11) . . . . ? 
C35 C36 Ru4 C32 -103.5(6) . . . . ? 
C31 C36 Ru4 C32 28.6(6) . . . . ? 
C42 C36 Ru4 C32 142.9(11) . . . . ? 
C35 C36 Ru4 C34 -28.2(5) . . . . ? 
C31 C36 Ru4 C34 103.9(6) . . . . ? 
C42 C36 Ru4 C34 -141.8(11) . . . . ? 
C35 C36 Ru4 C33 -65.3(5) . . . . ? 
C31 C36 Ru4 C33 66.7(6) . . . . ? 
C42 C36 Ru4 C33 -178.9(10) . . . . ? 
C31 C36 Ru4 C35 132.1(8) . . . . ? 
C42 C36 Ru4 C35 -113.6(12) . . . . ? 
C35 C36 Ru4 C31 -132.1(8) . . . . ? 
C42 C36 Ru4 C31 114.3(12) . . . . ? 
C35 C36 Ru4 Ru6 93.9(5) . . . . ? 
C31 C36 Ru4 Ru6 -134.0(5) . . . . ? 
C42 C36 Ru4 Ru6 -19.7(11) . . . . ? 
C35 C36 Ru4 Ru5 149.9(8) . . . . ? 
C31 C36 Ru4 Ru5 -78.0(12) . . . . ? 
C42 C36 Ru4 Ru5 36.3(17) . . . . ? 
C34 C33 Ru4 O3 -72.8(5) . . . . ? 
C32 C33 Ru4 O3 154.5(4) . . . . ? 
C39 C33 Ru4 O3 44.5(11) . . . . ? 
C34 C33 Ru4 C32 132.7(7) . . . . ? 
C39 C33 Ru4 C32 -110.0(12) . . . . ? 
C32 C33 Ru4 C34 -132.7(7) . . . . ? 
C39 C33 Ru4 C34 117.3(13) . . . . ? 
C34 C33 Ru4 C36 65.5(5) . . . . ? 
C32 C33 Ru4 C36 -67.2(5) . . . . ? 
C39 C33 Ru4 C36 -177.2(11) . . . . ? 
C34 C33 Ru4 C35 29.0(5) . . . . ? 
C32 C33 Ru4 C35 -103.6(5) . . . . ? 
C39 C33 Ru4 C35 146.4(12) . . . . ? 
C34 C33 Ru4 C31 102.3(6) . . . . ? 
C32 C33 Ru4 C31 -30.4(4) . . . . ? 
C39 C33 Ru4 C31 -140.4(12) . . . . ? 
C34 C33 Ru4 Ru6 -58.7(8) . . . . ? 
C32 C33 Ru4 Ru6 168.6(4) . . . . ? 
C39 C33 Ru4 Ru6 58.6(13) . . . . ? 
C34 C33 Ru4 Ru5 -122.9(5) . . . . ? 
C32 C33 Ru4 Ru5 104.5(4) . . . . ? 
C39 C33 Ru4 Ru5 -5.5(11) . . . . ? 
C34 C35 Ru4 O3 75.6(6) . . . . ? 
C36 C35 Ru4 O3 -151.1(5) . . . . ? 
C41 C35 Ru4 O3 -38.1(11) . . . . ? 
C34 C35 Ru4 C32 -67.4(6) . . . . ? 
C36 C35 Ru4 C32 65.9(5) . . . . ? 
C41 C35 Ru4 C32 178.9(11) . . . . ? 
C36 C35 Ru4 C34 133.3(8) . . . . ? 
C41 C35 Ru4 C34 -113.7(13) . . . . ? 
C34 C35 Ru4 C36 -133.3(8) . . . . ? 
C41 C35 Ru4 C36 113.0(12) . . . . ? 
C34 C35 Ru4 C33 -29.7(6) . . . . ? 
C36 C35 Ru4 C33 103.6(6) . . . . ? 
C41 C35 Ru4 C33 -143.4(12) . . . . ? 
C34 C35 Ru4 C31 -104.2(6) . . . . ? 
C36 C35 Ru4 C31 29.1(5) . . . . ? 
C41 C35 Ru4 C31 142.1(12) . . . . ? 
C34 C35 Ru4 Ru6 125.4(5) . . . . ? 
C36 C35 Ru4 Ru6 -101.3(5) . . . . ? 
C41 C35 Ru4 Ru6 11.7(11) . . . . ? 
C34 C35 Ru4 Ru5 62.1(8) . . . . ? 
C36 C35 Ru4 Ru5 -164.5(5) . . . . ? 
C41 C35 Ru4 Ru5 -51.6(13) . . . . ? 
C36 C31 Ru4 O3 -32(3) . . . . ? 
C32 C31 Ru4 O3 102(3) . . . . ? 
C37 C31 Ru4 O3 -146(3) . . . . ? 
C36 C31 Ru4 C32 -133.4(9) . . . . ? 
C37 C31 Ru4 C32 112.6(11) . . . . ? 
C36 C31 Ru4 C34 -65.1(6) . . . . ? 
C32 C31 Ru4 C34 68.3(5) . . . . ? 
C37 C31 Ru4 C34 -179.1(9) . . . . ? 
C32 C31 Ru4 C36 133.4(9) . . . . ? 
C37 C31 Ru4 C36 -114.0(11) . . . . ? 
C36 C31 Ru4 C33 -102.4(6) . . . . ? 
C32 C31 Ru4 C33 31.0(5) . . . . ? 
C37 C31 Ru4 C33 143.7(10) . . . . ? 
C36 C31 Ru4 C35 -29.0(5) . . . . ? 
C32 C31 Ru4 C35 104.4(6) . . . . ? 
C37 C31 Ru4 C35 -143.0(10) . . . . ? 
C36 C31 Ru4 Ru6 67.3(7) . . . . ? 
C32 C31 Ru4 Ru6 -159.3(4) . . . . ? 
C37 C31 Ru4 Ru6 -46.7(10) . . . . ? 
C36 C31 Ru4 Ru5 159.9(4) . . . . ? 
C32 C31 Ru4 Ru5 -66.7(6) . . . . ? 
C37 C31 Ru4 Ru5 46.0(10) . . . . ? 
Ru4 O3 Ru5 C45 176.9(3) . . . . ? 
Ru6 O3 Ru5 C45 -96.2(3) . . . . ? 
Ru4 O3 Ru5 C44 -155.5(4) . . . . ? 
Ru6 O3 Ru5 C44 -68.6(5) . . . . ? 
Ru4 O3 Ru5 C48 77.4(4) . . . . ? 
Ru6 O3 Ru5 C48 164.3(3) . . . . ? 
Ru4 O3 Ru5 C46 142.2(3) . . . . ? 
Ru6 O3 Ru5 C46 -130.8(3) . . . . ? 
Ru4 O3 Ru5 C47 105.1(3) . . . . ? 
Ru6 O3 Ru5 C47 -167.9(3) . . . . ? 
Ru4 O3 Ru5 C43 79(4) . . . . ? 
Ru6 O3 Ru5 C43 166(4) . . . . ? 
Ru6 O3 Ru5 Ru4 86.94(18) . . . . ? 
Ru4 O3 Ru5 Ru6 -86.94(18) . . . . ? 
C46 C45 Ru5 O3 -72.9(5) . . . . ? 
C44 C45 Ru5 O3 154.7(4) . . . . ? 
C46 C45 Ru5 C44 132.4(7) . . . . ? 
C46 C45 Ru5 C48 66.1(4) . . . . ? 
C44 C45 Ru5 C48 -66.3(5) . . . . ? 
C44 C45 Ru5 C46 -132.4(7) . . . . ? 
C46 C45 Ru5 C47 28.9(4) . . . . ? 
C44 C45 Ru5 C47 -103.5(5) . . . . ? 
C46 C45 Ru5 C43 102.8(5) . . . . ? 
C44 C45 Ru5 C43 -29.6(5) . . . . ? 
C46 C45 Ru5 Ru4 -66.8(8) . . . . ? 
C44 C45 Ru5 Ru4 160.8(5) . . . . ? 
C46 C45 Ru5 Ru6 -122.9(4) . . . . ? 
C44 C45 Ru5 Ru6 104.7(4) . . . . ? 
C43 C44 Ru5 O3 -174.7(5) . . . . ? 
C45 C44 Ru5 O3 -43.4(7) . . . . ? 
C43 C44 Ru5 C45 -131.3(8) . . . . ? 
C43 C44 Ru5 C48 -29.2(5) . . . . ? 
C45 C44 Ru5 C48 102.1(5) . . . . ? 
C43 C44 Ru5 C46 -103.2(6) . . . . ? 
C45 C44 Ru5 C46 28.1(5) . . . . ? 
C43 C44 Ru5 C47 -66.2(5) . . . . ? 
C45 C44 Ru5 C47 65.1(5) . . . . ? 
C45 C44 Ru5 C43 131.3(8) . . . . ? 
C43 C44 Ru5 Ru4 70.5(9) . . . . ? 
C45 C44 Ru5 Ru4 -158.2(5) . . . . ? 
C43 C44 Ru5 Ru6 137.5(4) . . . . ? 
C45 C44 Ru5 Ru6 -91.2(5) . . . . ? 
C43 C48 Ru5 O3 179.8(4) . . . . ? 
C47 C48 Ru5 O3 46.1(7) . . . . ? 
C43 C48 Ru5 C45 68.3(5) . . . . ? 
C47 C48 Ru5 C45 -65.4(6) . . . . ? 
C43 C48 Ru5 C44 29.9(5) . . . . ? 
C47 C48 Ru5 C44 -103.8(6) . . . . ? 
C43 C48 Ru5 C46 103.9(6) . . . . ? 
C47 C48 Ru5 C46 -29.8(6) . . . . ? 
C43 C48 Ru5 C47 133.7(8) . . . . ? 
C47 C48 Ru5 C43 -133.7(8) . . . . ? 
C43 C48 Ru5 Ru4 -129.1(4) . . . . ? 
C47 C48 Ru5 Ru4 97.1(5) . . . . ? 
C43 C48 Ru5 Ru6 -67.6(13) . . . . ? 
C47 C48 Ru5 Ru6 158.7(9) . . . . ? 
C45 C46 Ru5 O3 116.5(4) . . . . ? 
C47 C46 Ru5 O3 -110.3(5) . . . . ? 
C52 C46 Ru5 O3 2.1(11) . . . . ? 
C47 C46 Ru5 C45 133.3(7) . . . . ? 
C52 C46 Ru5 C45 -114.4(12) . . . . ? 
C45 C46 Ru5 C44 -30.0(4) . . . . ? 
C47 C46 Ru5 C44 103.3(5) . . . . ? 
C52 C46 Ru5 C44 -144.4(12) . . . . ? 
C45 C46 Ru5 C48 -103.4(5) . . . . ? 
C47 C46 Ru5 C48 29.9(5) . . . . ? 
C52 C46 Ru5 C48 142.3(12) . . . . ? 
C45 C46 Ru5 C47 -133.3(7) . . . . ? 
C52 C46 Ru5 C47 112.3(13) . . . . ? 
C45 C46 Ru5 C43 -67.2(5) . . . . ? 
C47 C46 Ru5 C43 66.1(5) . . . . ? 
C52 C46 Ru5 C43 178.4(11) . . . . ? 
C45 C46 Ru5 Ru4 152.8(4) . . . . ? 
C47 C46 Ru5 Ru4 -73.9(5) . . . . ? 
C52 C46 Ru5 Ru4 38.4(12) . . . . ? 
C45 C46 Ru5 Ru6 74.4(5) . . . . ? 
C47 C46 Ru5 Ru6 -152.3(4) . . . . ? 
C52 C46 Ru5 Ru6 -39.9(12) . . . . ? 
C46 C47 Ru5 O3 78.7(6) . . . . ? 
C48 C47 Ru5 O3 -150.2(5) . . . . ? 
C46 C47 Ru5 C45 -27.8(5) . . . . ? 
C48 C47 Ru5 C45 103.3(6) . . . . ? 
C46 C47 Ru5 C44 -65.9(6) . . . . ? 
C48 C47 Ru5 C44 65.2(5) . . . . ? 
C46 C47 Ru5 C48 -131.1(8) . . . . ? 
C48 C47 Ru5 C46 131.1(8) . . . . ? 
C46 C47 Ru5 C43 -103.2(6) . . . . ? 
C48 C47 Ru5 C43 27.9(5) . . . . ? 
C46 C47 Ru5 Ru4 128.4(5) . . . . ? 
C48 C47 Ru5 Ru4 -100.5(5) . . . . ? 
C46 C47 Ru5 Ru6 58.9(9) . . . . ? 
C48 C47 Ru5 Ru6 -170.0(4) . . . . ? 
C48 C43 Ru5 O3 -1(4) . . . . ? 
C44 C43 Ru5 O3 130(4) . . . . ? 
C49 C43 Ru5 O3 -119(4) . . . . ? 
C48 C43 Ru5 C45 -101.2(5) . . . . ? 
C44 C43 Ru5 C45 30.3(5) . . . . ? 
C49 C43 Ru5 C45 141.2(9) . . . . ? 
C48 C43 Ru5 C44 -131.5(7) . . . . ? 
C49 C43 Ru5 C44 110.9(10) . . . . ? 
C44 C43 Ru5 C48 131.5(7) . . . . ? 
C49 C43 Ru5 C48 -117.6(10) . . . . ? 
C48 C43 Ru5 C46 -65.6(5) . . . . ? 
C44 C43 Ru5 C46 65.9(6) . . . . ? 
C49 C43 Ru5 C46 176.9(9) . . . . ? 
C48 C43 Ru5 C47 -28.6(5) . . . . ? 
C44 C43 Ru5 C47 102.9(6) . . . . ? 
C49 C43 Ru5 C47 -146.1(9) . . . . ? 
C48 C43 Ru5 Ru4 73.6(5) . . . . ? 
C44 C43 Ru5 Ru4 -154.9(4) . . . . ? 
C49 C43 Ru5 Ru4 -44.0(10) . . . . ? 
C48 C43 Ru5 Ru6 163.1(3) . . . . ? 
C44 C43 Ru5 Ru6 -65.4(6) . . . . ? 
C49 C43 Ru5 Ru6 45.6(9) . . . . ? 
C32 Ru4 Ru5 O3 140.4(3) . . . . ? 
C34 Ru4 Ru5 O3 58.9(4) . . . . ? 
C36 Ru4 Ru5 O3 -119.0(10) . . . . ? 
C33 Ru4 Ru5 O3 98.6(3) . . . . ? 
C35 Ru4 Ru5 O3 17.7(6) . . . . ? 
C31 Ru4 Ru5 O3 178.6(4) . . . . ? 
Ru6 Ru4 Ru5 O3 -57.1(2) . . . . ? 
O3 Ru4 Ru5 C45 -7.8(7) . . . . ? 
C32 Ru4 Ru5 C45 132.5(8) . . . . ? 
C34 Ru4 Ru5 C45 51.1(8) . . . . ? 
C36 Ru4 Ru5 C45 -126.8(12) . . . . ? 
C33 Ru4 Ru5 C45 90.8(8) . . . . ? 
C35 Ru4 Ru5 C45 9.9(9) . . . . ? 
C31 Ru4 Ru5 C45 170.8(8) . . . . ? 
Ru6 Ru4 Ru5 C45 -65.0(7) . . . . ? 
O3 Ru4 Ru5 C44 133.6(7) . . . . ? 
C32 Ru4 Ru5 C44 -86.0(7) . . . . ? 
C34 Ru4 Ru5 C44 -167.5(7) . . . . ? 
C36 Ru4 Ru5 C44 14.6(12) . . . . ? 
C33 Ru4 Ru5 C44 -127.8(7) . . . . ? 
C35 Ru4 Ru5 C44 151.3(8) . . . . ? 
C31 Ru4 Ru5 C44 -47.8(7) . . . . ? 
Ru6 Ru4 Ru5 C44 76.4(6) . . . . ? 
O3 Ru4 Ru5 C48 -135.4(3) . . . . ? 
C32 Ru4 Ru5 C48 5.0(3) . . . . ? 
C34 Ru4 Ru5 C48 -76.5(4) . . . . ? 
C36 Ru4 Ru5 C48 105.7(10) . . . . ? 
C33 Ru4 Ru5 C48 -36.7(3) . . . . ? 
C35 Ru4 Ru5 C48 -117.7(6) . . . . ? 
C31 Ru4 Ru5 C48 43.3(4) . . . . ? 
Ru6 Ru4 Ru5 C48 167.5(2) . . . . ? 
O3 Ru4 Ru5 C46 -54.2(4) . . . . ? 
C32 Ru4 Ru5 C46 86.2(4) . . . . ? 
C34 Ru4 Ru5 C46 4.7(4) . . . . ? 
C36 Ru4 Ru5 C46 -173.2(11) . . . . ? 
C33 Ru4 Ru5 C46 44.4(4) . . . . ? 
C35 Ru4 Ru5 C46 -36.5(6) . . . . ? 
C31 Ru4 Ru5 C46 124.4(5) . . . . ? 
Ru6 Ru4 Ru5 C46 -111.4(3) . . . . ? 
O3 Ru4 Ru5 C47 -93.9(3) . . . . ? 
C32 Ru4 Ru5 C47 46.5(4) . . . . ? 
C34 Ru4 Ru5 C47 -35.0(4) . . . . ? 
C36 Ru4 Ru5 C47 147.1(11) . . . . ? 
C33 Ru4 Ru5 C47 4.7(4) . . . . ? 
C35 Ru4 Ru5 C47 -76.2(6) . . . . ? 
C31 Ru4 Ru5 C47 84.7(4) . . . . ? 
Ru6 Ru4 Ru5 C47 -151.0(2) . . . . ? 
O3 Ru4 Ru5 C43 -174.6(4) . . . . ? 
C32 Ru4 Ru5 C43 -34.3(4) . . . . ? 
C34 Ru4 Ru5 C43 -115.7(4) . . . . ? 
C36 Ru4 Ru5 C43 66.4(11) . . . . ? 
C33 Ru4 Ru5 C43 -76.0(4) . . . . ? 
C35 Ru4 Ru5 C43 -156.9(7) . . . . ? 
C31 Ru4 Ru5 C43 4.0(5) . . . . ? 
Ru6 Ru4 Ru5 C43 128.2(3) . . . . ? 
O3 Ru4 Ru5 Ru6 57.1(2) . . . . ? 
C32 Ru4 Ru5 Ru6 -162.5(3) . . . . ? 
C34 Ru4 Ru5 Ru6 116.1(3) . . . . ? 
C36 Ru4 Ru5 Ru6 -61.8(10) . . . . ? 
C33 Ru4 Ru5 Ru6 155.8(3) . . . . ? 
C35 Ru4 Ru5 Ru6 74.9(5) . . . . ? 
C31 Ru4 Ru5 Ru6 -124.2(4) . . . . ? 
Ru4 O3 Ru6 C57 154.3(4) . . . . ? 
Ru5 O3 Ru6 C57 66.8(5) . . . . ? 
Ru4 O3 Ru6 C55 -76.2(4) . . . . ? 
Ru5 O3 Ru6 C55 -163.6(4) . . . . ? 
Ru4 O3 Ru6 C58 -177.8(2) . . . . ? 
Ru5 O3 Ru6 C58 94.8(3) . . . . ? 
Ru4 O3 Ru6 C56 -70(3) . . . . ? 
Ru5 O3 Ru6 C56 -158(3) . . . . ? 
Ru4 O3 Ru6 C54 -105.9(3) . . . . ? 
Ru5 O3 Ru6 C54 166.6(3) . . . . ? 
Ru4 O3 Ru6 C53 -141.9(3) . . . . ? 
Ru5 O3 Ru6 C53 130.7(3) . . . . ? 
Ru5 O3 Ru6 Ru4 -87.42(17) . . . . ? 
Ru4 O3 Ru6 Ru5 87.42(17) . . . . ? 
C58 C57 Ru6 O3 44.6(6) . . . . ? 
C56 C57 Ru6 O3 174.1(4) . . . . ? 
C58 C57 Ru6 C55 -102.0(5) . . . . ? 
C56 C57 Ru6 C55 27.5(5) . . . . ? 
C56 C57 Ru6 C58 129.5(7) . . . . ? 
C58 C57 Ru6 C56 -129.5(7) . . . . ? 
C58 C57 Ru6 C54 -64.4(5) . . . . ? 
C56 C57 Ru6 C54 65.1(5) . . . . ? 
C58 C57 Ru6 C53 -28.8(4) . . . . ? 
C56 C57 Ru6 C53 100.7(5) . . . . ? 
C58 C57 Ru6 Ru4 161.3(5) . . . . ? 
C56 C57 Ru6 Ru4 -69.2(8) . . . . ? 
C58 C57 Ru6 Ru5 91.6(4) . . . . ? 
C56 C57 Ru6 Ru5 -138.9(4) . . . . ? 
C56 C55 Ru6 O3 179.1(5) . . . . ? 
C54 C55 Ru6 O3 -49.7(7) . . . . ? 
C56 C55 Ru6 C57 -28.7(6) . . . . ? 
C54 C55 Ru6 C57 102.5(6) . . . . ? 
C56 C55 Ru6 C58 -65.8(6) . . . . ? 
C54 C55 Ru6 C58 65.4(5) . . . . ? 
C54 C55 Ru6 C56 131.2(8) . . . . ? 
C56 C55 Ru6 C54 -131.2(8) . . . . ? 
C56 C55 Ru6 C53 -102.9(7) . . . . ? 
C54 C55 Ru6 C53 28.4(5) . . . . ? 
C56 C55 Ru6 Ru4 128.8(5) . . . . ? 
C54 C55 Ru6 Ru4 -100.0(5) . . . . ? 
C56 C55 Ru6 Ru5 70.1(15) . . . . ? 
C54 C55 Ru6 Ru5 -158.6(10) . . . . ? 
C57 C58 Ru6 O3 -154.5(4) . . . . ? 
C53 C58 Ru6 O3 72.9(5) . . . . ? 
C53 C58 Ru6 C57 -132.7(7) . . . . ? 
C57 C58 Ru6 C55 66.6(5) . . . . ? 
C53 C58 Ru6 C55 -66.1(5) . . . . ? 
C57 C58 Ru6 C56 30.9(5) . . . . ? 
C53 C58 Ru6 C56 -101.8(6) . . . . ? 
C57 C58 Ru6 C54 104.2(5) . . . . ? 
C53 C58 Ru6 C54 -28.5(5) . . . . ? 
C57 C58 Ru6 C53 132.7(7) . . . . ? 
C57 C58 Ru6 Ru4 -159.4(5) . . . . ? 
C53 C58 Ru6 Ru4 67.9(8) . . . . ? 
C57 C58 Ru6 Ru5 -104.2(4) . . . . ? 
C53 C58 Ru6 Ru5 123.1(5) . . . . ? 
C55 C56 Ru6 O3 -7(4) . . . . ? 
C57 C56 Ru6 O3 -140(3) . . . . ? 
C55 C56 Ru6 C57 133.7(8) . . . . ? 
C57 C56 Ru6 C55 -133.7(8) . . . . ? 
C55 C56 Ru6 C58 103.1(6) . . . . ? 
C57 C56 Ru6 C58 -30.5(5) . . . . ? 
C55 C56 Ru6 C54 30.3(5) . . . . ? 
C57 C56 Ru6 C54 -103.4(5) . . . . ? 
C55 C56 Ru6 C53 65.9(6) . . . . ? 
C57 C56 Ru6 C53 -67.7(5) . . . . ? 
C55 C56 Ru6 Ru4 -72.5(6) . . . . ? 
C57 C56 Ru6 Ru4 153.9(4) . . . . ? 
C55 C56 Ru6 Ru5 -162.2(4) . . . . ? 
C57 C56 Ru6 Ru5 64.2(6) . . . . ? 
C53 C54 Ru6 O3 -80.0(6) . . . . ? 
C55 C54 Ru6 O3 147.9(5) . . . . ? 
C53 C54 Ru6 C57 66.0(6) . . . . ? 
C55 C54 Ru6 C57 -66.0(6) . . . . ? 
C53 C54 Ru6 C55 132.1(8) . . . . ? 
C53 C54 Ru6 C58 29.4(6) . . . . ? 
C55 C54 Ru6 C58 -102.6(6) . . . . ? 
C53 C54 Ru6 C56 103.2(7) . . . . ? 
C55 C54 Ru6 C56 -28.8(6) . . . . ? 
C55 C54 Ru6 C53 -132.1(8) . . . . ? 
C53 C54 Ru6 Ru4 -130.1(5) . . . . ? 
C55 C54 Ru6 Ru4 97.9(5) . . . . ? 
C53 C54 Ru6 Ru5 -58.1(8) . . . . ? 
C55 C54 Ru6 Ru5 169.8(5) . . . . ? 
C54 C53 Ru6 O3 109.5(6) . . . . ? 
C58 C53 Ru6 O3 -118.4(5) . . . . ? 
C59 C53 Ru6 O3 -7.6(9) . . . . ? 
C54 C53 Ru6 C57 -103.3(6) . . . . ? 
C58 C53 Ru6 C57 28.8(5) . . . . ? 
C59 C53 Ru6 C57 139.6(10) . . . . ? 
C54 C53 Ru6 C55 -29.8(6) . . . . ? 
C58 C53 Ru6 C55 102.3(6) . . . . ? 
C59 C53 Ru6 C55 -146.8(10) . . . . ? 
C54 C53 Ru6 C58 -132.1(8) . . . . ? 
C59 C53 Ru6 C58 110.9(11) . . . . ? 
C54 C53 Ru6 C56 -65.6(6) . . . . ? 
C58 C53 Ru6 C56 66.6(5) . . . . ? 
C59 C53 Ru6 C56 177.4(10) . . . . ? 
C58 C53 Ru6 C54 132.1(8) . . . . ? 
C59 C53 Ru6 C54 -117.0(12) . . . . ? 
C54 C53 Ru6 Ru4 71.8(6) . . . . ? 
C58 C53 Ru6 Ru4 -156.1(4) . . . . ? 
C59 C53 Ru6 Ru4 -45.2(10) . . . . ? 
C54 C53 Ru6 Ru5 152.1(5) . . . . ? 
C58 C53 Ru6 Ru5 -75.8(5) . . . . ? 
C59 C53 Ru6 Ru5 35.0(10) . . . . ? 
C32 Ru4 Ru6 O3 135.5(8) . . . . ? 
C34 Ru4 Ru6 O3 -59.0(3) . . . . ? 
C36 Ru4 Ru6 O3 -136.3(3) . . . . ? 
C33 Ru4 Ru6 O3 -18.2(6) . . . . ? 
C35 Ru4 Ru6 O3 -96.6(3) . . . . ? 
C31 Ru4 Ru6 O3 -173.4(4) . . . . ? 
Ru5 Ru4 Ru6 O3 56.59(17) . . . . ? 
O3 Ru4 Ru6 C57 -136.6(7) . . . . ? 
C32 Ru4 Ru6 C57 -1.1(10) . . . . ? 
C34 Ru4 Ru6 C57 164.4(8) . . . . ? 
C36 Ru4 Ru6 C57 87.1(8) . . . . ? 
C33 Ru4 Ru6 C57 -154.8(8) . . . . ? 
C35 Ru4 Ru6 C57 126.8(8) . . . . ? 
C31 Ru4 Ru6 C57 50.0(8) . . . . ? 
Ru5 Ru4 Ru6 C57 -80.0(7) . . . . ? 
O3 Ru4 Ru6 C55 135.7(3) . . . . ? 
C32 Ru4 Ru6 C55 -88.8(8) . . . . ? 
C34 Ru4 Ru6 C55 76.8(4) . . . . ? 
C36 Ru4 Ru6 C55 -0.6(4) . . . . ? 
C33 Ru4 Ru6 C55 117.5(6) . . . . ? 
C35 Ru4 Ru6 C55 39.2(4) . . . . ? 
C31 Ru4 Ru6 C55 -37.7(4) . . . . ? 
Ru5 Ru4 Ru6 C55 -167.7(2) . . . . ? 
O3 Ru4 Ru6 C58 6.2(7) . . . . ? 
C32 Ru4 Ru6 C58 141.7(10) . . . . ? 
C34 Ru4 Ru6 C58 -52.8(7) . . . . ? 
C36 Ru4 Ru6 C58 -130.1(7) . . . . ? 
C33 Ru4 Ru6 C58 -12.0(8) . . . . ? 
C35 Ru4 Ru6 C58 -90.4(7) . . . . ? 
C31 Ru4 Ru6 C58 -167.2(7) . . . . ? 
Ru5 Ru4 Ru6 C58 62.8(6) . . . . ? 
O3 Ru4 Ru6 C56 173.5(4) . . . . ? 
C32 Ru4 Ru6 C56 -51.0(8) . . . . ? 
C34 Ru4 Ru6 C56 114.6(4) . . . . ? 
C36 Ru4 Ru6 C56 37.2(4) . . . . ? 
C33 Ru4 Ru6 C56 155.3(6) . . . . ? 
C35 Ru4 Ru6 C56 77.0(4) . . . . ? 
C31 Ru4 Ru6 C56 0.1(4) . . . . ? 
Ru5 Ru4 Ru6 C56 -129.9(3) . . . . ? 
O3 Ru4 Ru6 C54 94.0(3) . . . . ? 
C32 Ru4 Ru6 C54 -130.5(8) . . . . ? 
C34 Ru4 Ru6 C54 35.0(4) . . . . ? 
C36 Ru4 Ru6 C54 -42.3(4) . . . . ? 
C33 Ru4 Ru6 C54 75.8(6) . . . . ? 
C35 Ru4 Ru6 C54 -2.6(4) . . . . ? 
C31 Ru4 Ru6 C54 -79.4(4) . . . . ? 
Ru5 Ru4 Ru6 C54 150.6(3) . . . . ? 
O3 Ru4 Ru6 C53 56.2(3) . . . . ? 
C32 Ru4 Ru6 C53 -168.4(8) . . . . ? 
C34 Ru4 Ru6 C53 -2.8(4) . . . . ? 
C36 Ru4 Ru6 C53 -80.2(4) . . . . ? 
C33 Ru4 Ru6 C53 38.0(6) . . . . ? 
C35 Ru4 Ru6 C53 -40.4(4) . . . . ? 
C31 Ru4 Ru6 C53 -117.3(4) . . . . ? 
Ru5 Ru4 Ru6 C53 112.7(3) . . . . ? 
O3 Ru4 Ru6 Ru5 -56.59(17) . . . . ? 
C32 Ru4 Ru6 Ru5 78.9(8) . . . . ? 
C34 Ru4 Ru6 Ru5 -115.6(3) . . . . ? 
C36 Ru4 Ru6 Ru5 167.1(3) . . . . ? 
C33 Ru4 Ru6 Ru5 -74.8(5) . . . . ? 
C35 Ru4 Ru6 Ru5 -153.2(3) . . . . ? 
C31 Ru4 Ru6 Ru5 130.0(3) . . . . ? 
C45 Ru5 Ru6 O3 102.5(3) . . . . ? 
C44 Ru5 Ru6 O3 144.0(3) . . . . ? 
C48 Ru5 Ru6 O3 -124.0(11) . . . . ? 
C46 Ru5 Ru6 O3 65.6(4) . . . . ? 
C47 Ru5 Ru6 O3 26.3(7) . . . . ? 
C43 Ru5 Ru6 O3 -178.5(4) . . . . ? 
Ru4 Ru5 Ru6 O3 -56.6(2) . . . . ? 
O3 Ru5 Ru6 C57 -145.8(4) . . . . ? 
C45 Ru5 Ru6 C57 -43.3(4) . . . . ? 
C44 Ru5 Ru6 C57 -1.8(4) . . . . ? 
C48 Ru5 Ru6 C57 90.2(11) . . . . ? 
C46 Ru5 Ru6 C57 -80.2(5) . . . . ? 
C47 Ru5 Ru6 C57 -119.5(7) . . . . ? 
C43 Ru5 Ru6 C57 35.7(4) . . . . ? 
Ru4 Ru5 Ru6 C57 157.6(3) . . . . ? 
O3 Ru5 Ru6 C55 120.9(12) . . . . ? 
C45 Ru5 Ru6 C55 -136.6(13) . . . . ? 
C44 Ru5 Ru6 C55 -95.2(13) . . . . ? 
C48 Ru5 Ru6 C55 -3.1(16) . . . . ? 
C46 Ru5 Ru6 C55 -173.6(13) . . . . ? 
C47 Ru5 Ru6 C55 147.1(14) . . . . ? 
C43 Ru5 Ru6 C55 -57.7(13) . . . . ? 
Ru4 Ru5 Ru6 C55 64.3(12) . . . . ? 
O3 Ru5 Ru6 C58 -105.7(3) . . . . ? 
C45 Ru5 Ru6 C58 -3.2(4) . . . . ? 
C44 Ru5 Ru6 C58 38.2(3) . . . . ? 
C48 Ru5 Ru6 C58 130.3(11) . . . . ? 
C46 Ru5 Ru6 C58 -40.1(5) . . . . ? 
C47 Ru5 Ru6 C58 -79.5(7) . . . . ? 
C43 Ru5 Ru6 C58 75.7(4) . . . . ? 
Ru4 Ru5 Ru6 C58 -162.3(3) . . . . ? 
O3 Ru5 Ru6 C56 177.1(5) . . . . ? 
C45 Ru5 Ru6 C56 -80.4(5) . . . . ? 
C44 Ru5 Ru6 C56 -39.0(5) . . . . ? 
C48 Ru5 Ru6 C56 53.1(11) . . . . ? 
C46 Ru5 Ru6 C56 -117.4(6) . . . . ? 
C47 Ru5 Ru6 C56 -156.7(7) . . . . ? 
C43 Ru5 Ru6 C56 -1.5(5) . . . . ? 
Ru4 Ru5 Ru6 C56 120.5(4) . . . . ? 
O3 Ru5 Ru6 C54 -29.1(6) . . . . ? 
C45 Ru5 Ru6 C54 73.4(6) . . . . ? 
C44 Ru5 Ru6 C54 114.8(6) . . . . ? 
C48 Ru5 Ru6 C54 -153.1(12) . . . . ? 
C46 Ru5 Ru6 C54 36.5(6) . . . . ? 
C47 Ru5 Ru6 C54 -2.9(8) . . . . ? 
C43 Ru5 Ru6 C54 152.4(6) . . . . ? 
Ru4 Ru5 Ru6 C54 -85.7(5) . . . . ? 
O3 Ru5 Ru6 C53 -67.0(4) . . . . ? 
C45 Ru5 Ru6 C53 35.5(4) . . . . ? 
C44 Ru5 Ru6 C53 76.9(4) . . . . ? 
C48 Ru5 Ru6 C53 169.0(11) . . . . ? 
C46 Ru5 Ru6 C53 -1.5(5) . . . . ? 
C47 Ru5 Ru6 C53 -40.8(7) . . . . ? 
C43 Ru5 Ru6 C53 114.4(4) . . . . ? 
Ru4 Ru5 Ru6 C53 -123.6(3) . . . . ? 
O3 Ru5 Ru6 Ru4 56.6(2) . . . . ? 
C45 Ru5 Ru6 Ru4 159.1(3) . . . . ? 
C44 Ru5 Ru6 Ru4 -159.4(2) . . . . ? 
C48 Ru5 Ru6 Ru4 -67.4(11) . . . . ? 
C46 Ru5 Ru6 Ru4 122.2(4) . . . . ? 
C47 Ru5 Ru6 Ru4 82.9(6) . . . . ? 
C43 Ru5 Ru6 Ru4 -121.9(3) . . . . ? 
  
loop_ 
 _geom_hbond_atom_site_label_D 
 _geom_hbond_atom_site_label_H 
 _geom_hbond_atom_site_label_A 
 _geom_hbond_distance_DH 
 _geom_hbond_distance_HA 
 _geom_hbond_distance_DA 
 _geom_hbond_angle_DHA 
 _geom_hbond_site_symmetry_A 
O4 H4A F1  0.84 2.12 2.902(12) 154.5 1_455 
  
_diffrn_measured_fraction_theta_max    0.950 
_diffrn_reflns_theta_full              25.92 
_diffrn_measured_fraction_theta_full   0.950 
_refine_diff_density_max    0.939 
_refine_diff_density_min   -1.411 
_refine_diff_density_rms    0.126 
